# Supplementary material
Source: PubMed Central journal article supplement (PMC3266624)
Supplement: NIHMS321456-supplement-Supp_Fig_S1-S9.pdf [file NIHMS321456-supplement-Supp_Fig_S1-S9.pdf]

## Supporting Information

### Enamel malformations associated with a defined *DSPP* mutation in two families

WANG S-K, CHAN H-C, RAJDERKAR S, MILKOVICH R, USTON K, KIM J-W, SIMMER JP, HU JC-C

University of Michigan School of Dentistry, Ann Arbor, MI, USA and  
School of Dentistry, Seoul National University, Korea

- Fig. 1S.** Alignment of human dentin phosphoprotein (DPP) length haplotypes noting the positions of disease-causing mutations.
- Fig. 2S.** The merged DPP sequence and *DSPP* 5-prime disease-causing mutations.
- Fig. 3S.** Human DPP reference sequence translated in three reading frames.
- Fig. 4S.** Oral photographs and dental radiographs of the family 1 proband (IV:1).
- Fig. 5S.** Oral photographs and dental radiographs of family 1 proband's affected youngest brother (IV:3).
- Fig. 6S.** Oral photographs and dental radiographs of family 1 proband's other affected brother (IV:2).
- Fig. 7S.** Oral photographs and dental radiographs of the family 1 affected father (III:7).
- Fig. 8S.** Oral photographs and dental radiographs of the family 1 unaffected mother (III:8).
- Fig. 9S.** Oral photographs and dental radiographs of family 2 proband (IV:2).

## Figure S1

Alignment of human dentin phosphoprotein (DPP) length haplotypes noting the positions of disease-causing mutations. The positions of many *DSPP* insertions-deletions (indels) are sometimes flexible. That is, they could be moved left or right in the alignment without increasing nucleotide mismatches. We elected to position the indels as annotated in Table 2 of SONG et al. (1). Indels reported by MCKNIGHT et al. (2) were slid along the sequence to align with those from SONG et al., when possible, or were positioned to minimize mismatches.

The *DSPP* cDNA reference sequence (RefSeq) (NM\_014208.3) encodes a DPP region having 839 amino acids. Insertions and deletions of this sequence that maintain the reading frame do not appear to cause a phenotype. The RefSeq nucleotide sequence is numbered starting with the A in the *DSPP* translation initiation codon (ATG), which is nucleotide 120 in NM\_014208.3. The amino acids are numbered from the start of the *DSPP* protein at Met1 and refer to the number in the reference (not merged) sequence.

MCKNIGHT et al. reported 38 different haplotypes derived from 188 normal human chromosomes. Twenty indels among the 38 haplotypes were arranged in 22 different patterns. The 38 McKnight haplotypes were grouped according to their indel patterns based upon the MCKNIGHT et al. Supplementary Table S4B. One haplotype from each group was used in the alignment. The grouped haplotypes are in brackets with the aligned haplotype sequence in bold: [1, 7, 16, **35** (791 aa)], [2, 23, **28** (788 aa)], **3** (845 aa), **4** (782 aa), **5** (785 aa), **6** (785 aa), **8** (791 aa), [9, **14** (same as RefSeq; 839 aa)], [10, 12, 15, 17, 18, **34** (788 aa)], [11, **20** (788 aa)], **13** (779 aa), [19, 21, **22** (797 aa)], [23, **28** (788 aa)], **24** (902 aa), **25** (842 aa), **26** (779 aa), [27, **31** (788 aa)], **29** (785 aa), [30, **36** (794 aa)], **32** (788 aa), **33** (758 aa), **37** (770 aa), **38** (782 aa).

The McKnight haplotype sequences were imported from GenBank and provided the haplotype sequence starting with *DSPP* nucleotide 2572 encoding Arg<sup>396</sup>. For the purpose of this analysis, the reference sequence (NM\_014208.3) was used to complete the McKnight DPP sequences 5' to this position, with the exception of Clone 37, where the short sequence 5' to nucleotide 2572 was obtained from Hap37A to ensure correct positioning of indel 1.

The SONG et al. haplotype sequences were not available in GenBank. These sequences were obtained by using the *DSPP* cDNA reference sequence (NM\_014208.3) and changing it according to SONG et al., Tables 2 and 3. SONG et al. reported 15 haplotypes that showed 13 different indel patterns. One Song haplotype from each of the

13 groups was used in the alignment: **1** (803 aa), **2** (839 aa), **3** (788 aa), **4** (788 aa), **5** (790 aa), [**6**, **6T**, (797 aa)], [**6(2)**, **6(2)T** (796 aa)], **7** (782 aa), **102** (791 aa), **130** (794 aa), **106** (806 aa), **72** (785 aa), **110** (782 aa). Song haplotype 2 has the same indel pattern as McKnight haplotypes [9, 14] and the reference sequence. Song haplotype 3 has the same indel pattern as McKnight haplotypes [19, 21, 22]. There are 33 unique indel patterns reported by these two studies, with the DPP protein ranging from 770 to 902 amino acids.

In this alignment, the positions of single nucleotide polymorphisms listed in SONG et al. are noted. The five frameshift mutations listed in Table 1 of SONG et al. (1), the four frameshifts shown in Table 1 of MCKNIGHT et al. (2), the single frameshift mutation reported in MCKNIGHT et al. (3), the nine frameshifts reported by NIEMINEN et al. (4) and the two frameshifts reported by LEE et al. (5)

## References

1. SONG YL, WANG CN, FAN MW, SU B, BIAN Z. Dentin phosphoprotein frameshift mutations in hereditary dentin disorders and their variation patterns in normal human population. *J Med Genet* 2008; **45**: 457-464.
2. MCKNIGHT DA, SUZANNE HART P, HART TC, HARTSFIELD JK, WILSON A, WRIGHT JT, FISHER LW. A comprehensive analysis of normal variation and disease-causing mutations in the human dspp gene. *Hum Mutat* 2008; **29**: 1392-1404.
3. MCKNIGHT DA, SIMMER JP, HART PS, HART TC, FISHER LW. Overlapping dspp mutations cause dentin dysplasia and dentinogenesis imperfecta. *J Dent Res* 2008; **87**: 1108-1111.
4. NIEMINEN P, PAPAGIANNOULIS-LASCARIDES L, WALTIMO-SIREN J, OLLILA P, KARJALAINEN S, ARTE S, VEERKAMP J, WALTON VT, KUSTNER EC, SILTANEN T, HOLAPPA H, LUKINMAA PL, ALALUUSUA S. Frameshift mutations in dentin phosphoprotein and dependence of dentin disease phenotype on mutation location. *J Bone Miner Res* 2011; **2010**: 14.
5. LEE KE, KANG HY, LEE SK, YOO SH, LEE JC, HWANG YH, NAM KH, KIM JS, PARK JC, KIM JW. Novel dentin phosphoprotein frameshift mutations in dentinogenesis imperfecta type ii. *Clin Genet* 2010: 8.
6. DONG J, GU T, JEFFORDS L, MACDOUGALL M. Dentin phosphoprotein compound mutation in dentin sialophosphoprotein causes dentinogenesis imperfecta type iii. *Am J Med Genet* 2005; **132**: 305-309.

Figure S1. Human DPP Alignment, p. 3

RefSeq gatg atcccaatag cagtgatgaa tctaattggca atgatgatgc taattcagaa 1440  
 Merged gatg atcccaatag cagtgatgaa tctaattggca atgatgatgc taattcagaa  
 RefSeq (463) D D P N S S D E S N G N D D A N S E 480

RefSeq agtgacaata acagcagtag ccgaggagat gcttcttata actctgatga atcaaaagat 1500  
 Merged agtgacaata acagcagtag ccgaggagat gcttcttata actctgatga atcaaaagat  
 RefSeq S D N N S S S R G D A S Y N S D E S K D 500

RefSeq aatggcaatg gcagtgactc aaaaggagca gaagatgatg acagtgatag cacatcagac 1560  
 Merged aatggcaatg gcagtgactc aaaaggagca gaagatgatg acagtgatag cacatcagac  
 RefSeq N G N G S D S K G A E D D D S D S T S D 520

RefSeq actaataata gtgacagtaa tggcaatggt aacaatggga atgatgacaa tgacaaatca 1620  
 Merged actaataata gtgacagtaa tggcaatggt aacaatggga atgatgacaa tgacaaatca  
 RefSeq T N N S D S N G N G N N G N D D N D K S 540

RefSeq gacagtgcca aaggtaaate agatagcagt gacagtgata gtagtgatag cagcaatagc 1680  
 Merged gacagtgcca aaggtaaate agatagcagt gacagtgata gtagtgatag cagcaatagc  
 RefSeq D S G K G K S D S S D S D S S D S S N S 560

RefSeq agtgatagta gtgacagcag tgacagtgac agcagtgata gcaacagtag cagtgatagt 1740  
 Merged agtgatagta gtgacagcag tgacagtgac agcagtgata gcaacagtag cagtgatagt  
 RefSeq S D S S D S S D S D S S D S N S S S D S 580

**Note:** Dentin dysplasia II mutation c.1686delT; p.D562EfsX1313 (Nieminen, kindred 1).

RefSeq gacagcagtg acagtgacag cagtgatagc agtgacagtg atagtagtga tagcagcaat 1800  
 Merged gacagcagtg acagtgacag cagtgatagc agtgacagtg atagtagtga tagcagcaat  
 RefSeq D S S D S D S S D S S D S D S S D S S N 600

RefSeq agcagtgaca gtagtacag cagtgatagc agtgacagta gtgatagtag tgacagcagt 1860  
 Merged agcagtgaca gtagtacag cagtgatagc agtgacagta gtgatagtag tgacagcagt  
 RefSeq S S D S S D S S D S S D S S D S S D S S 620

**Note:** Dentin dysplasia II mutation c.1830delC; p.S610RfsX1313 (Nieminen, kindred 2).

RefSeq gacagcaagt **cag**acagcag caaatcagag agcgacagca gtgatagtga cagtaagt**ca** 1920  
 Merged gacagcaagt cagacagcag caaatcagag agcgacagca gtgatagtga cagtaagtca  
 RefSeq D S K S D S S K S E S D S S D S D S K S 640

**Notes:** Dentin dysplasia II mutation c.1870\_1873delTCAG; p.K623fsX1312 (McKnight).

Dentin dysplasia II mutation c.1918\_1921delTCAG; p.K639fsX1312 (McKnight).

Dentin dysplasia II mutation c.1918\_1921delTCAG; p.K639fsX1312 (Nieminen, kindreds 3-5).

RefSeq **gacag**cagtg acagcaacag cagtgacagt agtgacaaca gtgatagcag cgacagcagc 1980  
 Merged gacagcagtg acagcaacag cagtgacagt agtgacaaca gtgatagcag **cg**acagcagc  
 RefSeq D S S D S N S S D S S D N S D S S D S S 660

**Notes:** Dentin dysplasia II mutation c.1922-1925delACAG; p.D641AfsX1312 (Nieminen, kindred 6).

Snpl: c1971C>T; p.S557.

RefSeq aatagcagta acagcagtg tagtagtgac agcagtgata gcagtgacag cagcagtagc 2040  
 Merged aatagcagta acagcagtg tagtagtgac agcagtgata gcagtgacag cagcagtagc  
 RefSeq N S S N S S D S S D S S D S S D S S S S 680

**Note:** Dentin dysplasia II mutation c.2040delC; p.S680fsX1313 (Song)

RefSeq agtgacagca gca-----acagcag **tg**atagtagt gacagtagtg acagcagcaa  
 SHap1: agtgacagca gcagtagcagtgacagcagcaacagcag tgatagtagt gacagtagtg acagcagcaa  
 SHap2: agtgacagca gca-----acagcag tgatagtagt gacagtagtg acagcagcaa

Figure S1. Human DPP Alignment, p. 4

SHap3: agtgacagca gca-----acagcag tgatagtagt gacagtagtg acagcagcaa  
 SHap4: agtgacagca gca-----acagcag tgatagtagt gacagtagtg acagcagcaa  
 SHap5: agtgacagca gcagtagcagtgacagcagcaacagcag tgatagtagt gacagtagtg acagcagcaa  
 SHap6: agtgacagca gcagtagcagtgacagcagcaacagcag tgatagtagt gacagtagtg acagcagcaa  
 SHap6 (2) agtgacagca gcagtagcagtgacagcagcaacagcag tgatagtagt gacagtagtg acagcagcaa  
 SHap7 agtgacagca gca-----acagcag tgatagtagt gacagtagtg acagcagcaa  
 SHap102 agtgacagca gca-----acagcag tgatagtagt gacagtagtg acagcagcaa  
 SHap130 agtgacagca gcagtagcagtgacagcagcaacagcag tgatagtagt gacagtagtg acagcagcaa  
 SHap106 agtgacagca gcagtagcagtgacagcagcaacagcag tgatagtagt gacagtagtg acagcagcaa  
 SHap72 agtgacagca gca-----acagcag tgatagtagt gacagtagtg acagcagcaa  
 SHap110 agtgacagca gca-----acagcag tgatagtagt gacagtagtg acagcagcaa  
 Merged agtgacagca gcagtagcagtgacagcagcaacagcag tgatagtagt gacagtagtg acagcagcaa  
 Merged S D S S **S S S D S S** N S S D S S D S S D S S N

**Notes:** Id1: c.2053\_2054insGTAGCAGTGACAGCAGCA; p.684\_N685insSSSDSS 697

Dentin dysplasia II mutation c.2063delA; p.D688VfsX1313 (Nieminen, kindreds 7 & 8).

RefSeq tagcagtgag agcagtgata gtagtgcag cagtgatagtg gacagcagtg atagtagtga 2150  
 Merged tagcagtgag agcagtgata gtagtgcag cagtgatagtg gacagcagtg atagtagtga  
 RefSeq S S E S S D S S D S S D S D S S D S S D 717  
 RefSeq cagcagtaat agtaacagca gcgatagtg cagcagcaac agcagcgata gcagtgacag 2210  
 Merged cagcagtaat agtaacagca gcgatagtg cagcagcaac agcagcgata gcagtgacag  
 RefSeq S S N S N S S D S D S S N S S D S S D S 737  
 RefSeq cagcaacagc agtgacagca gtgatagcag tgacagcagc aacagcagtg acagtagcga 2270  
 Merged cagcaacagc agtgacagca gtgatagcag tgacagcagc aacagcagtg acagtagcga  
 RefSeq S N S S D S S D S S D S S N S S D S S D 757  
 RefSeq tagcagtgac agcagcaaca gcagtgacag cagtgatagc agtgacagca gtgatagtag 2330  
 Merged tagcagtgac agcagcaaca gcagtgacag cagtgatagc agtgacagca gtgatagtag  
 RefSeq S S D S S N S S D S S D S S D S S D S S 777

**Note:** Dentinogenesis imperfecta type II mutation c.2272delA; p.S758fsX1313 (McKnight)

RefSeq tgacagcagc aacagcagtg atagcaacga cagcagcaat agcagtgaca gcagtgatag 2390  
 Merged tgacagcagc aacagcagtg atagcaacga cagcagcaat agcagtgaca gcagtgatag  
 RefSeq D S S N S S D S N D S S N S S D S S D S 797

**Note:** Dentinogenesis imperfecta type II mutation c.2349delT; p.S783RfsX1313 (Nieminen, kindred 9).

RefSeq cagcaacagc agtgatagca gcaacagcag tgatagcagtg gatagcagtg acagcagtgga 2450  
 Merged cagcaacagc agtgatagca gcaacagcag tgatagcagtg gatagcagtg acagcagtgga  
 RefSeq S N S S D S S N S S D S S D S S D S S D 817  
 RefSeq tagcgacagc agcaatagca gtgacagcag taatagtagt gacagcagcg atagcagcaa 2510  
 SHap1: tagcgacagc agcaatagca gtgacagcag taatagtagt gacagcagcg atagcagcaa  
 SHap2: tagcgacagc agcaatagca gtgacagcag taatagtagt gacagcagcg atagcagcaa  
 SHap3: tagcgacagc agcaatagca gtgacagcag taatagtagt gacagcagcg atagcagcaa  
 SHap4: tagcgacagc agcaatagca gtgacagcag taatagtagt gacagcagcg atagcagcaa  
 SHap5: tagcgacagc agcaatagca gtgacagcag taatagtagt gacagcagcg atagca---a  
 SHap6: tagcgacagc agcaatagca gtgacagcag taatagtagt gacagcagcg atagcagcaa  
 SHap6 (2) tagcgacagc agcaatagca gtgacagcag taatagtagt gacagcagcg atagca---a  
 SHap7 tagcgacagc agcaatagca gtgacagcag taatagtagt gacagcagcg atagcagcaa  
 SHap102 tagcgacagc agcaatagca gtgacagcag taatagtagt gacagcagcg atagcagcaa  
 SHap130 tagcgacagc agcaatagca gtgacagcag taatagtagt gacagcagcg atagcagcaa  
 SHap106 tagcgacagc agcaatagca gtgacagcag taatagtagt gacagcagcg atagcagcaa  
 SHap72 tagcgacagc agcaatagca gtgacagcag taatagtagt gacagcagcg atagcagcaa  
 SHap110 tagcgacagc agcaatagca gtgacagcag taatagtagt gacagcagcg atagcagcaa  
 Merged tagcgacagc agcaatagca gtgacagcag taatagtagt gacagcagcg atagcagcaa  
 Merged S D S S N S S D S S N S S D S S D S S N 837

**Note:** Id2 is c.2507\_2509delGCA; pS836fsX1313

Figure S1. Human DPP Alignment, p. 5

|           |            |            |            |                    |            |                   |      |
|-----------|------------|------------|------------|--------------------|------------|-------------------|------|
| RefSeq    | cagcagtgat | agcagcgaca | gcagcgatag | cagtgacggc         | agtgatagcg | acagcagcaa        | 2570 |
| Hap3      | cagcagtgat | agcagcgaca | gcagcgatag | cagtgacggc         | agtgatagcg | acagcagcaa        |      |
| Hap4      | cagcagtgat | agcagcgaca | gcagcgatag | cagtgacggc         | agtgatagcg | acagcagcaa        |      |
| Hap5      | cagcagtgat | agcagcgaca | gcagcgatag | cagtgacggc         | agtgatagcg | acagcagcaa        |      |
| Hap6      | cagcagtgat | agcagcgaca | gcagcgatag | cagtgacggc         | agtgatagcg | acagcagcaa        |      |
| Hap8      | cagcagtgat | agcagcgaca | gcagcgatag | cagtgacggc         | agtgatagcg | acagcagcaa        |      |
| Hap13     | cagcagtgat | agcagcgaca | gcagcgatag | cagtgacggc         | agtgatagcg | acagcagcaa        |      |
| Hap14     | cagcagtgat | agcagcgaca | gcagcgatag | cagtgacggc         | agtgatagcg | acagcagcaa        |      |
| Hap20     | cagcagtgat | agcagcgaca | gcagcgatag | cagtgacggc         | agtgatagcg | acagcagcaa        |      |
| Hap22     | cagcagtgat | agcagcgaca | gcagcgatag | cagtgacggc         | agtgatagcg | acagcagcaa        |      |
| Hap24     | cagcagtgat | agcagcgaca | gcagcgatag | cagtgacggc         | agtgatagcg | acagcagcaa        |      |
| Hap25     | cagcagtgat | agcagcgaca | gcagcgatag | cagtgacggc         | agtgatagcg | acagcagcaa        |      |
| Hap26     | cagcagtgat | agcagcgaca | gcagcgatag | cagtgacggc         | agtgatagcg | acagcagcaa        |      |
| Hap28     | cagcagtgat | agcagcgaca | gcagcgatag | cagtgacggc         | agtgatagcg | acagcagcaa        |      |
| Hap29     | cagcagtgat | agcagcgaca | gcagcgatag | cagtgacggc         | agtgatagcg | acagcagcaa        |      |
| Hap31     | cagcagtgat | agcagcgaca | gcagcgatag | cagtgacggc         | agtgatagcg | acagcagcaa        |      |
| Hap32     | cagcagtgat | agcagcgaca | gcagcgatag | cagtgacggc         | agtgatagcg | acagcagcaa        |      |
| Hap33     | cagcagtgat | agcagcgaca | gcagcgatag | cagtgacggc         | agtgatagcg | acagcagcaa        |      |
| Hap34     | cagcagtgat | agcagcgaca | gcagcgatag | cagtgacggc         | agtgatagcg | acagcagcaa        |      |
| Hap35     | cagcagtgat | agcagcgaca | gcagcgatag | cagtgacggc         | agtgatagcg | acagcagcaa        |      |
| Hap36     | cagcagtgat | agcagcgaca | gcagcgatag | cagtgacggc         | agtgatagcg | acagcagcaa        |      |
| Hap37     | cagcagtgat | agcagcgaca | gcagcgatag | cagtgac <b>agc</b> | agtgatagc- | -----             |      |
| Hap38     | cagcagtgat | agcagcgaca | gcagcgatag | cagtgacggc         | agtgatagcg | acagcagcaa        |      |
| SHap1:    | cagcagtgat | agcagcgaca | gcagcgatag | cagtgac <b>agc</b> | agtgatagcg | acagcagcaa        |      |
| SHap2:    | cagcagtgat | agcagcgaca | gcagcgatag | cagtgacggc         | agtgatagcg | acagcagcaa        |      |
| SHap3:    | cagcagtgat | agcagcgaca | gcagcgatag | cagtgac <b>agc</b> | agtgatagcg | acagcagcaa        |      |
| SHap4:    | cagcagtgat | agcagcgaca | gcagcgatag | cagtgacggc         | agtgatagcg | acagcagcaa        |      |
| SHap5:    | cagcagtgat | agcagcgaca | gcagcgatag | cagtgac <b>agc</b> | agtgatagcg | acagcagcaa        |      |
| SHap6:    | cagcagtgat | agcagcgaca | gcagcgatag | cagtgac <b>agc</b> | agtgatagcg | acagcagcaa        |      |
| SHap6 (2) | cagcagtgat | agcagcgaca | gcagcgatag | cagtgac <b>agc</b> | agtgatagcg | acagcagcaa        |      |
| SHap7     | cagcagtgat | agcagcgaca | gcagcgatag | cagtgacggc         | agtgatagcg | acagcagcaa        |      |
| SHap102   | cagcagtgat | agcagcgaca | gcagcgatag | cagtgac <b>agc</b> | agtgatagcg | acagcagcaa        |      |
| SHap130   | cagcagtgat | agcagcgaca | gcagcgatag | cagtgac <b>agc</b> | agtgatagcg | acagcagcaa        |      |
| SHap106   | cagcagtgat | agcagcgaca | gcagcgatag | cagtgac <b>agc</b> | agtgatagcg | acagcagcaa        |      |
| SHap72    | cagcagtgat | agcagcgaca | gcagcgatag | cagtgac <b>agc</b> | agtgatagcg | acagcagcaa        |      |
| SHap110   | cagcagtgat | agcagcgaca | gcagcgatag | cagtgacggc         | agtgatagcg | acagcagcaa        |      |
| Merged    | cagcagtgat | agcagcgaca | gcagcgatag | cagtgacggc         | agtgatagcg | <b>acagcagcaa</b> |      |
| Merged    | S S D      | S S D      | S S D S    | S D G/S            | S D S      | D S S N           | 857  |

Notes: Dentinogenesis imperfecta type II mutation c.2525delG; p.S842fsX1313 (McKnight)  
 Snp2 is c.2548G>A p.G850S

|           |                   |                   |                   |            |            |            |      |
|-----------|-------------------|-------------------|-------------------|------------|------------|------------|------|
| RefSeq    | tagaagtgac        | agtagtaata        | gtagtgacag        | cagcgatagc | agtgacagca | gcaacagcag | 2630 |
| Hap3      | tagaagtgac        | agtagtaata        | gtagtgacag        | cagcgatagc | agtgacagca | gcaacagcag |      |
| Hap4      | tagaagtgac        | agtagtaata        | gtagtgacag        | cagcgatagc | agtgacagca | gcaacagcag |      |
| Hap5      | tagaagtgac        | agtagtaata        | gtagtgacag        | cagcgatagc | agtgacagca | gcaacagcag |      |
| Hap6      | tagaagtgac        | agtagtaata        | gtagtgacag        | cagcgatagc | agtgacagca | gcaacagcag |      |
| Hap8      | tagaaggac         | agtagtaata        | gtagtgacag        | cagcgatagc | agtgacagca | gcaacagcag |      |
| Hap13     | tagaagtgac        | agtagtaata        | gtagtgacag        | cagcgatagc | agtgacagca | gcaacagcag |      |
| Hap14     | tagaagtgac        | agtagtaata        | gtagtgacag        | cagcgatagc | agtgacagca | gcaacagcag |      |
| Hap20     | tagaagtgac        | agtagtaata        | gtagtgacag        | cagcgatagc | agtgacagca | gcaacagcag |      |
| Hap22     | tagaagtgac        | agtagtaata        | gtagtgacag        | cagcgatagc | agtgacagca | gcaacagcag |      |
| Hap24     | tagaagtgac        | agtagtaata        | gtagtgacag        | cagcgatagc | agtgacagca | gcaacagcag |      |
| Hap25     | tagaagtgac        | agtagtaata        | gtagtgacag        | cagcgatagc | agtgacagca | gcaacagcag |      |
| Hap26     | tagaagtgac        | agtagtaata        | gtagtgacag        | cagcgatagc | agtgacagca | gcaacagcag |      |
| Hap28     | tagaagtgac        | agtagtaata        | gtagtgacag        | cagcgatagc | agtgacagca | gcaacagcag |      |
| Hap29     | tagaagtgac        | agtagtaata        | gtagtgacag        | cagcgatagc | agtgacagca | gcaacagcag |      |
| Hap31     | tagaagtgac        | agtagtaata        | gtagtgacag        | cagcgatagc | agtgacagca | gcaacagcag |      |
| Hap32     | tagaaggac         | agtagtaata        | gtagtgacag        | cagcgatagc | agtgacagca | gcaacagcag |      |
| Hap33     | tagaagtgac        | agtagtaata        | gtagtgacag        | cagcgatagc | agtgacagca | gcaacagcag |      |
| Hap34     | tagaagtgac        | agtagtaata        | gtagtgacag        | cagcgatagc | agtgacagca | gcaacagcag |      |
| Hap35     | tagaagtgac        | agtagtaata        | gtagtgacag        | cagcgatagc | agtgacagca | gcaacagcag |      |
| Hap36     | tagaagtgac        | agtagtaata        | gtagtgacag        | cagcgatagc | agtgacagca | gcaacagcag |      |
| Hap37     | -----             | -----             | ----gacag         | cagcgatagc | agtgacagca | gcaacagcag |      |
| Hap38     | tagaagtgac        | agtagtaata        | gtagtgacag        | cagcgatagc | agtgacagca | gcaacagcag |      |
| SHap1:    | tagaagtgac        | agtagtaata        | gtagtgacag        | cagcgatagc | agtgacagca | gcaacagcag |      |
| SHap2:    | tagaagtgac        | agtagtaata        | gtagtgacag        | cagcgatagc | agtgacagca | gcaacagcag |      |
| SHap3:    | tagaagtgac        | agtagtaata        | gtagtgacag        | cagcgatagc | agtgacagca | gcaacagcag |      |
| SHap4:    | tagaagtgac        | agtagtaata        | gtagtgacag        | cagcgatagc | agtgacagca | gcaacagcag |      |
| SHap5:    | tagaagtgac        | agtagtaata        | gtagtgacag        | cagcgatagc | agtgacagca | gcaacagcag |      |
| SHap6:    | tagaaggac         | agtagtaata        | gtagtgacag        | cagcgatagc | agtgacagca | gcaacagcag |      |
| SHap6 (2) | tagaagtgac        | agtagtaata        | gtagtgacag        | cagcgatagc | agtgacagca | gcaacagcag |      |
| SHap7     | tagaagtgac        | agtagtaata        | gtagtgacag        | cagcgatagc | agtgacagca | gcaacagcag |      |
| SHap102   | tagaagtgac        | agtagtaata        | gtagtgacag        | cagcgatagc | agtgacagca | gcaacagcag |      |
| SHap130   | tagaagtgac        | agtagtaata        | gtagtgacag        | cagcgatagc | agtgacagca | gcaacagcag |      |
| SHap106   | tagaagtgac        | agtagtaata        | gtagtgacag        | cagcgatagc | agtgacagca | gcaacagcag |      |
| SHap72    | tagaagtgac        | agtagtaata        | gtagtgacag        | cagcgatagc | agtgacagca | gcaacagcag |      |
| SHap110   | tagaagtgac        | agtagtaata        | gtagtgacag        | cagcgatagc | agtgacagca | gcaacagcag |      |
| Merged    | <b>tagaagtgac</b> | <b>agtagtaata</b> | <b>gtagtgacag</b> | cagcgatagc | agtgacagca | gcaacagcag |      |
| Merged    | R S D             | S S N             | S S D S           | S D S      | S D S      | S N S S    | 877  |

**Notes:** This is the beginning of the Hap3 to Hap38 sequences.

Indel 1 (36 Nt) is only in McKnight haplotype 37.

Dentinogenesis imperfecta type II mutation c.2593delA; p.S865fsX1313 (Song).

Figure S1. Human DPP Alignment, p. 7

|           |            |                              |            |            |            |      |
|-----------|------------|------------------------------|------------|------------|------------|------|
| RefSeq    | tgacagcagt | gatag-----cagtg              | acagcaacga | aagcagcaat | agcagtgaca | 2680 |
| Hap3      | tgacagcagt | gatag-----cagtg              | acagcaacga | aagcagcaat | agcagtgaca |      |
| Hap4      | tgacagcagt | gatagtagtgacagcagtg          | acagcaacga | aagcagcaat | agcagtgaca |      |
| Hap5      | tgacagcagt | gatagtagtgacagcagtg          | acagcaacga | aagcagcaat | agcagtgaca |      |
| Hap6      | tgacagcagt | gatagtagtgacagcagtg          | acagcaacga | aagcagcaat | agcagtgaca |      |
| Hap8      | tgacagcagt | gatagtagtgacagcagtg          | acagcaacga | aagcagcaat | agcagtgaca |      |
| Hap13     | tgacagcagt | gatagtagtgacagcagtg          | acagcaacga | aagcagcaat | agcagtgaca |      |
| Hap14     | tgacagcagt | gatag-----cagtg              | acagcaacga | aagcagcaat | agcagtgaca |      |
| Hap20     | tgacagcagt | gatagtagtgacagcagtg          | acagcaacga | aagcagcaat | agcagtgaca |      |
| Hap22     | tgacagcagt | gatagtagtgacagcagtg          | acagcaacga | aagcagcaat | agcagtgaca |      |
| Hap24     | tgacagcagt | gatag-----cagtg              | acagcaacga | aagcagcaat | agcagtgaca |      |
| Hap25     | tgacagcagt | gatagtagtgacagcagtg          | acagcaacga | aagcagcaat | agcagtgaca |      |
| Hap26     | tgacagcagt | gatagtagtgacagcagtg          | acagcaacga | aagcagcaat | agcagtgaca |      |
| Hap28     | tgacagcagt | gatag-----cagtg              | acagcaacga | aagcagcaat | agcagtgaca |      |
| Hap29     | tgacagcagt | gatagtagtgacagcagtg          | acagcaacga | aagcagcaat | agcagtgaca |      |
| Hap31     | tgacagcagt | gatagtagtgacagcagtg          | acagcaacga | aagcagcaat | agcagtgaca |      |
| Hap32     | tgacagcagt | gatagtagtgacagcagtg          | acagcaacga | aagcagcaat | agcagtgaca |      |
| Hap33     | tgacagcagt | gatagtagtgacagcagtg          | acagcaacga | aagcagcaat | agcagtgaca |      |
| Hap34     | tgacagcagt | gatagtagtgacagcagtg          | acagcaacga | aagcagcaat | agcagtgaca |      |
| Hap35     | tgacagcagt | gatagtagtgacagcagtg          | acagcaacga | aagcagcaat | agcagtgaca |      |
| Hap36     | tgacagcagt | gatagtagtgacagcagtg          | acagcaacga | aagcagcaat | agcagtgaca |      |
| Hap37     | tgacagcagt | gatagtagtgacagcagtg          | acagcaacga | aagcagcaat | agcagtgaca |      |
| Hap38     | tgacagcagt | gatagtagtgacagcagtg          | acagcaacga | aagcagcaat | agcagtgaca |      |
| SHap1:    | tgacagcagt | gatagtagtgacagcagtg          | acagcaacga | aagcagcaat | agcagtgaca |      |
| SHap2:    | tgacagcagt | gatag-----cagtg              | acagcaacga | aagcagcaat | agcagtgaca |      |
| SHap3:    | tgacagcagt | gatagtagtgacagcagtg          | acagcaacga | aagcagcaat | agcagtgaca |      |
| SHap4:    | tgacagcagt | gatag-----cagtg              | acagcaacga | aagcagcaat | agcagtgaca |      |
| SHap5:    | tgacagcagt | gatagtagtgacagcagtg          | acagcaacga | aagcagcaat | agcagtgaca |      |
| SHap6:    | tgacagcagt | gatagtagtgacagcagtg          | acagcaacga | aagcagcaat | agcagtgaca |      |
| SHap6 (2) | tgacagcagt | gatagtagtgacagcagtg          | acagcaacga | aagcagcaat | agcagtgaca |      |
| SHap7     | tgacagcagt | gatag-----cagtg              | acagcaacga | aagcagcaat | agcagtgaca |      |
| SHap102   | tgacagcagt | gatagtagtgacagcagtg          | acagcaacga | aagcagcaat | agcagtgaca |      |
| SHap130   | tgacagcagt | gatagtagtgacagcagtg          | acagcaacga | aagcagcaat | agcagtgaca |      |
| SHap106   | tgacagcagt | gatagtagtgacagcagtg          | acagcaacga | aagcagcaat | agcagtgaca |      |
| SHap72    | tgacagcagt | gatagtagtgacagcagtg          | acagcaacga | aagcagcaat | agcagtgaca |      |
| SHap110   | tgacagcagt | gatag-----cagtg              | acagcaacga | aagcagcaat | agcagtgaca |      |
| Merged    | tgacagcagt | gatag <u>tagtgacag</u> cagtg | acagcaacga | aagcagcaat | agcagtgaca |      |
| Merged    | D S S      | D S <b>S D S</b> S           | D S N E    | S S N      | S S D      | 893  |

**Notes:** Indel 2 (9 Nt) is in 4 unique McKnight haplotypes: 3; RefSeq/9/14; 2/23/28; and 24.

Id3: c.2645\_2646insTAGTGACAG; p.S82\_883insSDS.

Indel 2 (McKnight) & Id3 (Song) are the same.

Dentinogenesis imperfecta type II mutation c.2666delG; p.S889TfsX1313 (Nieminen, kindred 10).



Figure S1. Human DPP Alignment, p. 8

|           |                               |            |                     |            |            |                    |      |
|-----------|-------------------------------|------------|---------------------|------------|------------|--------------------|------|
| RefSeq    | gcag <b>g</b> tga <b>t</b> ag | cagcaacagc | agtgatagtg          | acagcagtga | tagcagcaac | agcagtgaca         | 2740 |
| Hap3      | gcagtgatag                    | cagcaacagc | agtga <b>c</b> agtg | acagcagtga | tagcagcaac | agcagtgaca         |      |
| Hap4      | gcagtgatag                    | cagcaacagc | agtgatagtg          | acagcagtga | tagcagcaac | agcagt----         |      |
| Hap5      | gcagtgatag                    | cagcaacagc | agtgatagtg          | acagcagtga | tagcagcaac | agcagt----         |      |
| Hap6      | gcagtgatag                    | cagcaacagc | agtgatagtg          | acagcagtga | tagcagcaac | agcagt----         |      |
| Hap8      | gcagtgatag                    | cagcaacagc | agtgatagtg          | acagcagtga | tagcagcaac | agcagtgaca         |      |
| Hap13     | gcagtgatag                    | cagcaacagc | agtgatagtg          | acagcagtga | tagcagcaac | agcagcgaca         |      |
| Hap14     | gcagtgatag                    | cagcaacagc | agtga <b>c</b> agtg | acagcagtga | tagcagcaac | agcagtgaca         |      |
| Hap20     | gcagtgatag                    | cagcaacagc | agtgatagtg          | acagcagtga | tagcagcaac | agcagt----         |      |
| Hap22     | gcagtgatag                    | cagcaacagc | agtgatagtg          | acagcagtga | tagcagcaac | agcagtgaca         |      |
| Hap24     | gcagtgatag                    | cagcaacagc | agtga <b>c</b> agtg | acagcagtga | tagcagcaac | agcagtgaca         |      |
| Hap25     | gcagtgatag                    | cagcaacagc | agtgatagtg          | acagcagtga | tagcagcaac | agcagtgaca         |      |
| Hap26     | gcagtgatag                    | cagcaacagc | agtgatagtg          | acagcagtga | tagcagcaac | agcagtgaca         |      |
| Hap28     | gcagtgatag                    | cagcaacagc | agtga <b>c</b> agtg | acagcagtga | tagcagcaac | agcagtgaca         |      |
| Hap29     | gcagtgatag                    | cagcaacagc | agtgatagtg          | acagcagtga | tagcagcaac | agcagtgaca         |      |
| Hap31     | gcagtgatag                    | cagcaacagc | agtgatagtg          | acagcagtga | tagcagcaac | agcagt----         |      |
| Hap32     | gcagtgatag                    | cagcaacagc | agtgatagtg          | acagcagtga | tagcagcaac | agcagt----         |      |
| Hap33     | gcagtgatag                    | cagcaacagc | agtgatagtg          | acagcagtga | tagcagcaac | agcagtgaca         |      |
| Hap34     | gcagtgatag                    | cagcaacagc | agtgatagtg          | acagcagtga | tagcagcaac | agcagcgaca         |      |
| Hap35     | gcagtgatag                    | cagcaacagc | agtgatagtg          | acagcagtga | tagcagcaac | agcagtgaca         |      |
| Hap36     | gcagtgatag                    | cagcaacagc | agtgatagtg          | acagcagtga | tagcagcaac | agcagt----         |      |
| Hap37     | gcagtgatag                    | cagcaacagc | agtgatagtg          | acagcagtga | tagcagcaac | agcagtgaca         |      |
| Hap38     | gcagtgatag                    | cagcaacagc | agtgatagtg          | acagcagtga | tagcagcaac | agcagt----         |      |
| SHap1:    | gcagtgatag                    | cagcaacagc | agtgatagtg          | acagcagtga | tagcagcaac | agcagtgaca         |      |
| SHap2:    | gcagtgatag                    | cagcaacagc | agtgatagtg          | acagcagtga | tagcagcaac | agcagtgaca         |      |
| SHap3:    | gcagtgatag                    | cagcaacagc | agtgatagtg          | acagcagtga | tagcagcaac | agcagtgaca         |      |
| SHap4:    | gcagtgatag                    | cagcaacagc | agtgatagtg          | acagcagtga | tagcagcaac | agcagtgaca         |      |
| SHap5:    | gcagtgatag                    | cagcaacagc | agtgatagtg          | acagcagtga | tagcagcaac | agcagtgaca         |      |
| SHap6:    | gcagtgatag                    | cagcaacagc | agtgatagtg          | acagcagtga | tagcagcaac | agcagtgaca         |      |
| SHap6 (2) | gcagtgatag                    | cagcaacagc | agtgatagtg          | acagcagtga | tagcagcaac | agcagtgaca         |      |
| SHap7     | gcagtgatag                    | cagcaacagc | agtgatagtg          | acagcagtga | tagcagcaac | agcagtgaca         |      |
| SHap102   | gcagtgatag                    | cagcaacagc | agtgatagtg          | acagcagtga | tagcagcaac | agcagtgaca         |      |
| SHap130   | gcagtgatag                    | cagcaacagc | agtgatagtg          | acagcagtga | tagcagcaac | agcagtgaca         |      |
| SHap106   | gcagtgatag                    | cagcaacagc | agtgatagtg          | acagcagtga | tagcagcaac | agcagtgaca         |      |
| SHap72    | gcagtgatag                    | cagcaacagc | agtgatagtg          | acagcagtga | tagcagcaac | agcagtgaca         |      |
| SHap110   | gcagtgatag                    | cagcaacagc | agtgatagtg          | acagcagtga | tagcagcaac | agcagtgaca         |      |
| Merged    | gcagtgatag                    | cagcaacagc | agtgatagtg          | acagcagtga | tagcagcaac | agcagt <b>gaca</b> |      |
| Merged    | S S D S                       | S N S      | S D S               | D S S D    | S S N      | S S D              | 913  |

**Notes:** Dentinogenesis imperfecta type II mutation c.2684delG; p.S895fsX1313 (Song).  
 Indel 3 (9 Nt) is in 8 unique McKnight haplotypes: 4, 5, 6, 11/20, 27/31, 32, 30/36, & 38.  
 Dentinogenesis imperfecta type II mutation c.2688delT; p.D896fsX1276 (Lee:ClinGenet).

|           |                   |            |            |            |            |            |      |
|-----------|-------------------|------------|------------|------------|------------|------------|------|
| RefSeq    | gcagtgatag        | cagcaacagc | agtgatagca | gtgaaagcag | taatagtagt | gacaacagca | 2800 |
| Hap3      | gcagtgatag        | cagcaacagc | agtgatagca | gtgaaagcag | taatagtagt | gacaacagca |      |
| Hap4      | -----gatag        | cagcaacagc | agtgatagca | gtgaaagcag | taatagtagt | gacaacagca |      |
| Hap5      | -----gatag        | cagcaacagc | agtgatagca | gtgaaagcag | taatagtagt | gacaacagca |      |
| Hap6      | -----gatag        | cagcaacagc | agtgatagca | gtgaaagcag | taatagtagt | gacaacagca |      |
| Hap8      | gcagtgatag        | cagcaacagc | agtgatagca | gtgaaagcag | taatagtagt | gacaacagca |      |
| Hap13     | gcagtgatag        | cagcaacagc | agtgatagca | gtgaaagcag | taatagtagt | gacaacagca |      |
| Hap14     | gcagtgatag        | cagcaacagc | agtgatagca | gtgaaagcag | taatagtagt | gacaacagca |      |
| Hap20     | -----gatag        | cagcaacagc | agtgatagca | gtgaaagcag | taatagtagt | gacaacagca |      |
| Hap22     | gcagtgatag        | cagcaacagc | agtgatagca | gtgaaagcag | taatagtagt | gacaacagca |      |
| Hap24     | gcagtgatag        | cagcaacagc | agtgatagca | gtgaaagcag | taatagtagt | gacaacagca |      |
| Hap25     | gcagtgatag        | cagcaacagc | agtgatagca | gtgaaagcag | taatagtagt | gacaacagca |      |
| Hap26     | gcagtgatag        | cagcaacagc | agtgatagca | gtgaaagcag | taatagtagt | gacaacagca |      |
| Hap28     | gcagtgatag        | cagcaacagc | agtgatagca | gtgaaagcag | taatagtagt | gacaacagca |      |
| Hap29     | gcagtgatag        | cagcaacagc | agtgatagca | gtgaaagcag | taatagtagt | gacaacagca |      |
| Hap31     | -----gatag        | cagcaacagc | agtgatagca | gtgaaagcag | taatagtagt | gacaacagca |      |
| Hap32     | -----gatag        | cagcaacagc | agtgatagca | gtgaaagcag | taatagtagt | gacaacagca |      |
| Hap33     | gcagtgatag        | cagcaacagc | agtgatagca | gtgaaagcag | taatagtagt | gacaacagca |      |
| Hap34     | gcagtgatag        | cagcaacagc | agtgatagca | gtgaaagcag | taatagtagt | gacaacagca |      |
| Hap35     | gcagtgatag        | cagcaacagc | agtgatagca | gtgaaagcag | taatagtagt | gacaacagca |      |
| Hap36     | -----gatag        | cagcaacagc | agtgatagca | gtgaaagcag | taatagtagt | gacaacagca |      |
| Hap37     | gcagtgatag        | cagcaacagc | agtgatagca | gtgaaagcag | taatagtagt | gacaacagca |      |
| Hap38     | -----gatag        | cagcaacagc | agtgatagca | gtgaaagcag | taatagtagt | gacaacagca |      |
| SHap1:    | gcagtgatag        | cagcaacagc | agtgatagca | gtgaaagcag | taatagtagt | gacaacagca |      |
| SHap2:    | gcagtgatag        | cagcaacagc | agtgatagca | gtgaaagcag | taatagtagt | gacaacagca |      |
| SHap3:    | gcagtgatag        | cagcaacagc | agtgatagca | gtgaaagcag | taatagtagt | gacaacagca |      |
| SHap4:    | gcagtgatag        | cagcaacagc | agtgatagca | gtgaaagcag | taatagtagt | gacaacagca |      |
| SHap5:    | gcagtgatag        | cagcaacagc | agtgatagca | gtgaaagcag | taatagtagt | gacaacagca |      |
| SHap6:    | gcagtgatag        | cagcaacagc | agtgatagca | gtgaaagcag | taatagtagt | gacaacagca |      |
| SHap6 (2) | gcagtgatag        | cagcaacagc | agtgatagca | gtgaaagcag | taatagtagt | gacaacagca |      |
| SHap7     | gcagtgatag        | cagcaacagc | agtgatagca | gtgaaagcag | taatagtagt | gacaacagca |      |
| SHap102   | gcagtgatag        | cagcaacagc | agtgatagca | gtgaaagcag | taatagtagt | gacaacagca |      |
| SHap130   | gcagtgatag        | cagcaacagc | agtgatagca | gtgaaagcag | taatagtagt | gacaacagca |      |
| SHap106   | gcagtgatag        | cagcaacagc | agtgatagca | gtgaaagcag | taatagtagt | gacaacagca |      |
| SHap72    | gcagtgatag        | cagcaacagc | agtgatagca | gtgaaagcag | taatagtagt | gacaacagca |      |
| SHap110   | gcagtgatag        | cagcaacagc | agtgatagca | gtgaaagcag | taatagtagt | gacaacagca |      |
| Merged    | <b>gcagtgatag</b> | cagcaacagc | agtgatagca | gtgaaagcag | taatagtagt | gacaacagca |      |
| Merged    | S S D S           | S N S      | S D S      | S E S S    | N S S      | D N S      | 933  |

Figure S1. Human DPP Alignment, p. 10

|           |            |            |            |            |                   |            |      |
|-----------|------------|------------|------------|------------|-------------------|------------|------|
| RefSeq    | atagcagtga | cagcagcaac | agcagtgaca | gcagtgatag | cagtgacagc        | agtaatagta | 2860 |
| Hap3      | atagcagtga | cagcagcaac | agcagtgaca | gcagtgatag | cagtgacagc        | agtaatagta |      |
| Hap4      | atagcagtga | cagcagcaac | agcagtgaca | gcagtgatag | cagtgacagc        | agtaatagta |      |
| Hap5      | atagcagtga | cagcagcaac | agcagtgaca | gcagtgatag | cagtgacagc        | agtaatagta |      |
| Hap6      | atagcagtga | cagcagcaac | agcagtgaca | gcagtgatag | cagtgacagc        | agtaatagta |      |
| Hap8      | atagcagtga | cagcagcaac | agcagtgaca | gcagtgatag | cagtgacagc        | agtaatagta |      |
| Hap13     | atagcagtga | cagcagcaac | agcagtgaca | gcagtgatag | cagtgacagc        | agtaatagta |      |
| Hap14     | atagcagtga | cagcagcaac | agcagtgaca | gcagtgatag | cagtgacagc        | agtaatagta |      |
| Hap20     | atagcagtga | cagcagcaac | agcagtgaca | gcagtgatag | cagtgacagc        | agtaatagta |      |
| Hap22     | atagcagtga | cagcagcaac | agcagtgaca | gcagtgatag | cagtgacagc        | agtaatagta |      |
| Hap24     | atagcagtga | cagcagcaac | agcagtgaca | gcagtgatag | cagtgacagc        | agtaatagta |      |
| Hap25     | atagcagtga | cagcagcaac | agcagtgaca | gcagtgatag | cagtgacagc        | agtaatagta |      |
| Hap26     | atagcagtga | cagcagcaac | agcagtgaca | gcagt----- | ----gacagc        | agtaatagta |      |
| Hap28     | atagcagtga | cagcagcaac | agcagtgaca | gcagtgatag | cagtgacagc        | agtaatagta |      |
| Hap29     | atagcagtga | cagcagcaac | agcagtgaca | gcagtgatag | cagtgacagc        | agtaatagta |      |
| Hap31     | atagcagtga | cagcagcaac | agcagtgaca | gcagtgatag | cagtgacagc        | agtaatagta |      |
| Hap32     | atagcagtga | cagcagcaac | agcagtgaca | gcagtgatag | cagtgacagc        | agtaatagta |      |
| Hap33     | atagcagtga | cagcagcaac | agcagtgaca | gcagtgatag | cagtgacagc        | agtaatagta |      |
| Hap34     | atagcagtga | cagcagcaac | agcagtgaca | gcagtgatag | cagtgacagc        | agtaatagta |      |
| Hap35     | atagcagtga | cagcagcaac | agcagtgaca | gcagtgatag | cagtgacagc        | agtaatagta |      |
| Hap36     | atagcagtga | cagcagcaac | agcagtgaca | gcagtgatag | cagtgacagc        | agtaatagta |      |
| Hap37     | atagcagtga | cagcagcaac | agcagtgaca | gcagt----- | ----gacagc        | agtaatagta |      |
| Hap38     | atagcagtga | cagcagcaac | agcagtgaca | gcagtgatag | cagtgacagc        | agtaatagta |      |
| SHap1:    | atagcagtga | cagcagcaac | agcagtgaca | gcagtgatag | cagtgacagc        | agtaatagta |      |
| SHap2:    | atagcagtga | cagcagcaac | agcagtgaca | gcagtgatag | cagtgacagc        | agtaatagta |      |
| SHap3:    | atagcagtga | cagcagcaac | agcagtgaca | gcagtgatag | cagtgacagc        | agtaatagta |      |
| SHap4:    | atagcagtga | cagcagcaac | agcagtgaca | gcagtgatag | cagtgacagc        | agtaatagta |      |
| SHap5:    | atagcagtga | cagcagcaac | agcagtgaca | gcagtgatag | cagtgacagc        | agtaatagta |      |
| SHap6:    | atagcagtga | cagcagcaac | agcagtgaca | gcagtgatag | cagtgacagc        | agtaatagta |      |
| SHap6 (2) | atagcagtga | cagcagcaac | agcagtgaca | gcagtgatag | cagtgacagc        | agtaatagta |      |
| SHap7     | atagcagtga | cagcagcaac | agcagtgaca | gcagtgatag | cagtgacagc        | agtaatagta |      |
| SHap102   | atagcagtga | cagcagcaac | agcagtgaca | gcagtgatag | cagtgacagc        | agtaatagta |      |
| SHap130   | atagcagtga | cagcagcaac | agcagtgaca | gcagtgatag | cagtgacagc        | agtaatagta |      |
| SHap106   | atagcagtga | cagcagcaac | agcagtgaca | gcagtgatag | cagtgacagc        | agtaatagta |      |
| SHap72    | atagcagtga | cagcagcaac | agcagtgaca | gcagtgatag | cagtgacagc        | agtaatagta |      |
| SHap110   | atagcagtga | cagcagcaac | agcagtgaca | gcagtgatag | cagtgacagc        | agtaatagta |      |
| Merged    | atagcagtga | cagcagcaac | agcagtgaca | gcagtgatag | <b>cagtgacagc</b> | agtaatagta |      |
| Merged    | N S S D    | S S N      | S S D      | S S D S    | S D S             | S N S      | 953  |

Figure S1. Human DPP Alignment, p. 11

|           |            |                     |            |            |            |            |      |
|-----------|------------|---------------------|------------|------------|------------|------------|------|
| RefSeq    | gtgacagcag | caatagcagt          | gacagcagca | acagcagtga | cagcagtgat | agcaatagca | 2920 |
| Hap3      | gtgacagcag | caatagcagt          | gacagcagca | acagcagtga | cagcagtgat | agcaatagca |      |
| Hap4      | gtgacagcag | caatagcagt          | gacagcagca | acagcagtga | cagcagtgat | agcaatagca |      |
| Hap5      | gtgacagcag | caatagcagt          | gacagcagca | acagcagtga | cagcagtgat | agcaatagca |      |
| Hap6      | gtgacagcag | caatagcagt          | gacagcagca | acagcagtga | cagcagtgat | agcaatagca |      |
| Hap8      | gtgacagcag | caatagc <b>g</b> gt | gacagcagca | acagcagtga | cagcagtgat | agcaatagca |      |
| Hap13     | gtgacagcag | caatagc <b>g</b> gt | gacagcagca | acagcagtga | cagcagtgat | agcaatagca |      |
| Hap14     | gtgacagcag | caatagcagt          | gacagcagca | acagcagtga | cagcagtgat | agcaatagca |      |
| Hap20     | gtgacagcag | caatagcagt          | gacagcagca | acagcagtga | cagcagtgat | agcaatagca |      |
| Hap22     | gtgacagcag | caatagc <b>g</b> gt | gacagcagca | acagcagtga | cagcagtgat | agcaatagca |      |
| Hap24     | gtgacagcag | caatagcagt          | gacagcagca | acagcagtga | cagcagtgat | agcaatagca |      |
| Hap25     | gtgacagcag | caatagc <b>g</b> gt | gacagcagca | acagcagtga | cagcagtgat | agcaatagca |      |
| Hap26     | gtgacagcag | caatagcagt          | gacagcagca | acagcagtga | cagcagtgat | agcaatagca |      |
| Hap28     | gtgacagcag | caatagcagt          | gacagcagca | acagcagtga | cagcagtgat | agcaatagca |      |
| Hap29     | gtgacagcag | caatagcagt          | gacagcagca | acagcagtga | cagcagtgat | agcaatagca |      |
| Hap31     | gtgacagcag | caatagcagt          | gacagcagca | acagcagtga | cagcagtgat | agcaatagca |      |
| Hap32     | gtgacagcag | caatagcagt          | gacagcagca | acagcagtga | cagcagtgat | agcaatagca |      |
| Hap33     | gtgacagcag | caatagc <b>g</b> gt | gacagcagca | acagcagtga | cagcagtgat | agcaatagca |      |
| Hap34     | gtgacagcag | caatagc <b>g</b> gt | gacagcagca | acagcagtga | cagcagtgat | agcaatagca |      |
| Hap35     | gtgacagcag | caatagc <b>g</b> gt | gacagcagca | acagcagtga | cagcagtgat | agcaatagca |      |
| Hap36     | gtgacagcag | caatagcagt          | gacagcagca | acagcagtga | cagcagtgat | agcaatagca |      |
| Hap37     | gtgacagcag | caatagcagt          | gacagcagca | acagcagtga | cagcagtgat | agcaatagca |      |
| Hap38     | gtgacagcag | caatagcagt          | gacagcagca | acagcagtga | cagcagtgat | agcaatagca |      |
| SHap1:    | gtgacagcag | caatagc <b>g</b> gt | gacagcagca | acagcagtga | cagcagtgat | agcaatagca |      |
| SHap2:    | gtgacagcag | caatagcagt          | gacagcagca | acagcagtga | cagcagtgat | agcaatagca |      |
| SHap3:    | gtgacagcag | caatagc <b>g</b> gt | gacagcagca | acagcagtga | cagcagtgat | agcaatagca |      |
| SHap4:    | gtgacagcag | caatagcagt          | gacagcagca | acagcagtga | cagcagtgat | agcaatagca |      |
| SHap5:    | gtgacagcag | caatagc <b>g</b> gt | gacagcagca | acagcagtga | cagcagtgat | agcaatagca |      |
| SHap6:    | gtgacagcag | caatagc <b>g</b> gt | gacagcagca | acagcagtga | cagcagtgat | agcaatagca |      |
| SHap6 (2) | gtgacagcag | caatagc <b>g</b> gt | gacagcagca | acagcagtga | cagcagtgat | agcaatagca |      |
| SHap7     | gtgacagcag | caatagcagt          | gacagcagca | acagcagtga | cagcagtgat | agcaatagca |      |
| SHap102   | gtgacagcag | caatagcagt          | gacagcagca | acagcagtga | cagcagtgat | agcaatagca |      |
| SHap130   | gtgacagcag | caatagc <b>g</b> gt | gacagcagca | acagcagtga | cagcagtgat | agcaatagca |      |
| SHap106   | gtgacagcag | caatagc <b>g</b> gt | gacagcagca | acagcagtga | cagcagtgat | agcaatagca |      |
| SHap72    | gtgacagcag | caatagc <b>g</b> gt | gacagcagca | acagcagtga | cagcagtgat | agcaatagca |      |
| SHap110   | gtgacagcag | caatagcagt          | gacagcagca | acagcagtga | cagcagtgat | agcaatagca |      |
| Merged    | gtgacagcag | caatagcagt          | gacagcagca | acagcagtga | cagcagtgat | agcaatagca |      |
| Merged    | S D S S    | N S S/ <b>G</b>     | D S S      | N S S D    | S S D      | S N S      | 973  |

Notes: Indel 4 (9 Nt) is in 2 unique McKnight haplotypes: 26 & 37.

Snp3: c.2878A>G; p.S960G



Figure S1. Human DPP Alignment, p. 13

|           |                    |            |                     |            |            |            |      |
|-----------|--------------------|------------|---------------------|------------|------------|------------|------|
| RefSeq    | gcagtgacag         | cagtgatagc | agcaacagca          | gtgatagcag | tgacagcagt | gacagcagtg | 3040 |
| Hap3      | gcagtgacag         | cagtgatagc | agcaacagca          | gtgatagcag | tgacagcagt | gacagcagtg |      |
| Hap4      | gcagtgacag         | cagtgatagc | agcgacagca          | gtgatagcag | tgacagcagt | gacagcagtg |      |
| Hap5      | gcagtgacag         | cagtgatagc | agc <b>g</b> acagca | gtgatagcag | tgacagcagt | gacagcagtg |      |
| Hap6      | gcagtgacag         | cagtgatagc | agcgacagca          | gtgatagcag | tgacagcagt | gacagcagtg |      |
| Hap8      | gcagtgacag         | cagtgatagc | agcaacagca          | gtgatagcag | tgacagcagt | gacagcagtg |      |
| Hap13     | gcagtgacag         | cagtgatagc | agcaacagca          | gtgatagcag | tgacagcagt | gacagcagtg |      |
| Hap14     | gcagtgacag         | cagtgatagc | agcaacagca          | gtgatagcag | tgacagcagt | gacagcagtg |      |
| Hap20     | gcagtgacag         | cagtgatagc | agcgacagca          | gtgatagcag | tgacagcagt | gacagcagtg |      |
| Hap22     | gcagtgacag         | cagtgatagc | agcaacagca          | gtgatagcag | tgacagcagt | gacagcagtg |      |
| Hap24     | gcagtgacag         | cagtgatagc | agcaacagca          | gtgatagcag | tgacagcagt | gacagcagtg |      |
| Hap25     | gcagtgacag         | cagtgatagc | agcaacagca          | gtgatagcag | tgacagcagt | gacagcagtg |      |
| Hap26     | ----gacag          | cagtgatagc | agcaacagca          | gtgatagcag | tgacagcagt | gacagcagtg |      |
| Hap28     | gcagtgacag         | cagtgatagc | agc <b>g</b> acagca | gtgatagcag | tgacagcagt | gacagcagtg |      |
| Hap29     | ----gacag          | cagtgatagc | agcaacagca          | gtgatagcag | tgacagcagt | gacagcagtg |      |
| Hap31     | gcagtgacag         | cagtgatagc | agcaacagca          | gtgatagcag | tgacagcagt | gacagcagtg |      |
| Hap32     | gcagtgacag         | cagtgatagc | agcaacagca          | gtgatagcag | tgacagcagt | gacagcagtg |      |
| Hap33     | gcagtgacag         | cagtgatagc | agcaacagca          | gtgatagcag | tgacagcagt | gacagcagtg |      |
| Hap34     | gcagtgacag         | cagtgatagc | agcaacagca          | gtgatagcag | tgacagcagt | gacagcagtg |      |
| Hap35     | gcagtgacag         | cagtgatagc | agcaacagca          | gtgatagcag | tgacagcagt | gacagcagtg |      |
| Hap36     | gcagtgacag         | cagtgatagc | agcaacagca          | gtgatagcag | tgacagcagt | gacagcagtg |      |
| Hap37     | ----gacag          | cagtgatagc | agcaacagca          | gtgatagcag | tgacagcagt | gacagcagtg |      |
| Hap38     | gcagtgacag         | cagtgatagc | agcaacagca          | gtgatagcag | tgacagcagt | gacagcagtg |      |
| SHap1:    | gcagtgacag         | cagtgatagc | agcaacagca          | gtgatagcag | tgacagcagt | gacagcagtg |      |
| SHap2:    | gcagtgacag         | cagtgatagc | agcaacagca          | gtgatagcag | tgacagcagt | gacagcagtg |      |
| SHap3:    | gcagtgacag         | cagtgatagc | agc <b>g</b> acagca | gtgatagcag | tgacagcagt | gacagcagtg |      |
| SHap4:    | gcagtgacag         | cagtgatagc | agc <b>g</b> acagca | gtgatagcag | tgacagcagt | gacagcagtg |      |
| SHap5:    | gcagtgacag         | cagtgatagc | agc <b>g</b> acagca | gtgatagcag | tgacagcagt | gacagcagtg |      |
| SHap6:    | gcagtgacag         | cagtgatagc | agcaacagca          | gtgatagcag | tgacagcagt | gacagcagtg |      |
| SHap6 (2) | gcagtgacag         | cagtgatagc | agcaacagca          | gtgatagcag | tgacagcagt | gacagcagtg |      |
| SHap7     | gcagtgacag         | cagtgatagc | agcaacagca          | gtgatagcag | tgacagcagt | gacagcagtg |      |
| SHap102   | gcagtgacag         | cagtgatagc | agc <b>g</b> acagca | gtgatagcag | tgacagcagt | gacagcagtg |      |
| SHap130   | gcagtgacag         | cagtgatagc | agcaacagca          | gtgatagcag | tgacagcagt | gacagcagtg |      |
| SHap106   | gcagtgacag         | cagtgatagc | agcaacagca          | gtgatagcag | tgacagcagt | gacagcagtg |      |
| SHap72    | gcagtgacag         | cagtgatagc | agcaacagca          | gtgatagcag | tgacagcagt | gacagcagtg |      |
| SHap110   | gcagtgacag         | cagtgatagc | agcaacagca          | gtgatagcag | tgacagcagt | gacagcagtg |      |
| Merged    | <b>gcagtg</b> acag | cagtgatagc | agcaacagca          | gtgatagcag | tgacagcagt | gacagcagtg |      |
| Merged    | S S D S            | S D S      | S N S               | S D S S    | D S S      | D S S      | 1013 |

Notes: Indel 5 (18 Nt) is in 3 unique McKnight haplotypes: 26, 29, & 37.  
 Snp3004A>G (not listed in Song et al.)

|           |            |                                         |                                         |
|-----------|------------|-----------------------------------------|-----------------------------------------|
| RefSeq    | atagcagtaa | tagtagtgacagcagcaatagcagtgacag          | cagcaacagcagtgacagcagcgatagcag          |
| Hap3      | atagcagtaa | tagtagtgacagcagcaatagcagtgacag          | cagcaacagcagtgacagcagcgatagcag          |
| Hap4      | atagcagtaa | tagt-----agtgacag                       | cagcaacagcagtgacagcagcgatagcag          |
| Hap5      | atagcagtaa | tagt-----agtgacag                       | cagcaacagcagtgacagcagcgatagcag          |
| Hap6      | atagcagtaa | tagt-----agtgacag                       | cagcaacagcagtgacagcagcgatagcag          |
| Hap8      | atagcagtaa | tagt-----agtgacag                       | cagcaacagcagtgacagcagcgatagcag          |
| Hap13     | atagcagtaa | tagt-----agtgacag                       | cagcaacagcagtgacagcagcgatagcag          |
| Hap14     | atagcagtaa | tagtagtgacagcagcaatagcagtgacag          | cagcaacagcagtgacagcagcgatagcag          |
| Hap20     | atagcagtaa | tagt-----agtgacag                       | cagcaacagcagtgacagcagcgatagcag          |
| Hap22     | atagcagtaa | tagt-----agtgacag                       | cagcaacagcagtgacagcagcgatagcag          |
| Hap24     | atagcagtaa | tagtagtgacagcagcaatagcagtgacag          | cagcaacagcagtgacagcagcgatagcag          |
| Hap25     | atagcagtaa | tagtagtgacagcagcaatagcagtgacag          | cagcagcagcagtgacagcagcgatagcag          |
| Hap26     | atagcagtaa | tagt-----agtgacag                       | cagcaac-----agcag                       |
| Hap28     | atagcagtaa | tagt-----agtgacag                       | cagcaacagcagtgacagcagcgatagcag          |
| Hap29     | atagcagtaa | tagt-----agtgacag                       | cagcaac-----agcag                       |
| Hap31     | atagcagtaa | tagt-----agtgacag                       | cagcaacagcagtgacagcagcgatagcag          |
| Hap32     | atagcagtaa | tagtagtgacagcagcaatagcagtgacag          | cagcaac-----agcag                       |
| Hap33     | atagcagtaa | tagt-----agtgacag                       | cagcaac-----agcag                       |
| Hap34     | atagcagtaa | tagt-----agtgacag                       | cagcaacagcagtgacagcagcgatagcag          |
| Hap35     | atagcagtaa | tagt-----agtgacag                       | cagcaac-----agcag                       |
| Hap36     | atagcagtaa | tagtagtgacagcagcaacagcagtgacag          | cagcaacagcagtgacagcagcgatagcag          |
| Hap37     | atagcagtaa | tagt-----agtgacag                       | cagcaac-----agcag                       |
| Hap38     | atagcagtaa | tagtagtgacagcagcaatagcagtgacag          | cagcaac-----agcag                       |
| SHap1:    | atagcagtaa | tagt-----agtgacag                       | cagcaacagcagtgacagcagcgatagcag          |
| SHap2:    | atagcagtaa | tagtagtgacagcagcaatagcagtgacag          | cagcaacagcagtgacagcagcgatagcag          |
| SHap3:    | atagcagtaa | tagt-----agtgacag                       | cagcaacagcagtgacagcagcgatagcag          |
| SHap4:    | atagcagtaa | tagt-----agtgacag                       | cagcaacagcagtgacagcagcgatagcag          |
| SHap5:    | atagcagtaa | tagt-----agtgacag                       | cagcaac-----agcag                       |
| SHap6:    | atagcagtaa | tagt-----agtgacag                       | cagcaac-----agcag                       |
| SHap6 (2) | atagcagtaa | tagt-----agtgacag                       | cagcaac-----agcag                       |
| SHap7     | atagcagtaa | tagt-----agtgacag                       | cagcaac-----agcag                       |
| SHap102   | atagcagtaa | tagt-----agtgacag                       | cagcaacagcagtgacagcagcgatagcag          |
| SHap130   | atagcagtaa | tagt-----agtgacag                       | cagcaac-----agcag                       |
| SHap106   | atagcagtaa | tagt-----agtgacag                       | cagcaac-----agcag                       |
| SHap72    | atagcagtaa | tagt-----agtgacag                       | cagcaacagcagtgacagcagcgatagcag          |
| SHap110   | atagcagtaa | tagt-----agtgacag                       | cagcaacagcagtgacagcagcgatagcag          |
| Merged    | atagcagtaa | tagt <b>agtgacagcagcaatagc</b> agtgacag | cagcaac <b>agcagtgacagcagcgat</b> agcag |
| Merged    | D S S N    | S S D S S N S S D S                     | S N S S D S S D S S                     |

Notes: Indel 6 (18 Nt) is in 15 unique McKnight haplotypes.

Id4: c.3055\_3072delAGTGACAGCAGCAATAGC; p.S1024delSDSSNS

Id4 (Song) is the same as Indel 6 (McKnight).

Figure S1. Human DPP Alignment, p. 15

|           |            |            |            |                   |            |          |      |
|-----------|------------|------------|------------|-------------------|------------|----------|------|
| RefSeq    | tgacagcagc | gatagcagtg | acagcagcga | tagcagtgac        | agcagtgaca | gcagcaat | 3168 |
| Hap3      | tgacagcagc | gatagcagtg | acagcagcga | tagcagtgac        | agcagtgaca | gcagcaat |      |
| Hap4      | tgacagcagc | gatagcagtg | acagcagcga | tagcagtgac        | agcagtgaca | gcagcaat |      |
| Hap5      | tgacagcagc | gatagcagtg | acagcagcga | tagcagtgac        | agcagtgaca | gcagcaat |      |
| Hap6      | tgacagcagc | gatagcagtg | acagcagcga | tagcagtgac        | agcagtgaca | gcagcaat |      |
| Hap8      | tgacagcagc | gatagcagtg | acagcagcga | tagcagtgac        | agcagtgaca | gcagcaat |      |
| Hap13     | tgacagcagc | gatagcagtg | acagcagcga | tagcagtgac        | agcagtgaca | gcagcaat |      |
| Hap14     | tgacagcagc | gatagcagtg | acagcagcga | tagcagtgac        | agcagtgaca | gcagcaat |      |
| Hap20     | tgacagcagc | gatagcagtg | acagcagcga | tagcagtgac        | agcagtgaca | gcagcaat |      |
| Hap22     | tgacagcagc | gatagcagtg | acagcagcga | tagcagtgac        | agcagtgaca | gcagcaat |      |
| Hap24     | tgacagcagc | gatagcagtg | acagcagcga | tagcagtgac        | agcagtgaca | gcagcaat |      |
| Hap25     | tgacagcagc | gatagcagtg | acagcagcga | tagcagtgac        | agcagtgaca | gcagcaat |      |
| Hap26     | tgacagcagc | gatagcagtg | acagcagcga | tagcagtgac        | agcagtgaca | gcagcaat |      |
| Hap28     | tgacagcagc | gatagcagtg | acagcagcga | tagcagtgac        | agcagtgaca | gcagcaat |      |
| Hap29     | tgacagcagc | gatagcagtg | acagcagcga | tagcagtgac        | agcagtgaca | gcagcaat |      |
| Hap31     | tgacagcagc | gatagcagtg | acagcagcga | tagcagtgac        | agcagtgaca | gcagcaat |      |
| Hap32     | tgacagcagc | gatagcagtg | acagcagcga | tagcagtgac        | agcagtgaca | gcagcaat |      |
| Hap33     | tgacagcagc | gatagcagtg | acagcagcga | tagcagtgac        | agcagtgaca | gcagcaat |      |
| Hap34     | tgacagcagc | gatagcagtg | acagcagcga | tagcagtgac        | agcagtgaca | gcagcaat |      |
| Hap35     | tgacagcagc | gatagcagtg | acagcagcga | tagcagtgac        | agcagtgaca | gcagcaat |      |
| Hap36     | tgacagcagc | gatagcagtg | acagcagcga | tagcagtgac        | agcagtgaca | gcagcaat |      |
| Hap37     | tgacagcagc | gatagcagtg | acagcagcga | tagcagtgac        | agcagtgaca | gcagcaat |      |
| Hap38     | tgacagcagc | gatagcagtg | acagcagcga | tagcagtgac        | agcagtgaca | gcagcaat |      |
| SHap1:    | tgacagcagc | gatagcagtg | acagcagcga | tagcagtgac        | agcagtgaca | gcagcaat |      |
| SHap2:    | tgacagcagc | gatagcagtg | acagcagcga | tagcagtgac        | agcagtgaca | gcagcaat |      |
| SHap3:    | tgacagcagc | gatagcagtg | acagcagcga | tagcagtgac        | agcagtgaca | gcagcaat |      |
| SHap4:    | tgacagcagc | gatagcagtg | acagcagcga | tagcagtgac        | agcagtgaca | gcagcaat |      |
| SHap5:    | tgacagcagc | gatagcagtg | acagcagcga | tagcagtgac        | agcagtgaca | gcagcaat |      |
| SHap6:    | tgacagcagc | gatagcagtg | acagcagcga | tagcagtgac        | agcagtgaca | gcagcaat |      |
| SHap6 (2) | tgacagcagc | gatagcagtg | acagcagcga | tagcagtgac        | agcagtgaca | gcagcaat |      |
| SHap7     | tgacagcagc | gatagcagtg | acagcagcga | tagcagtgac        | agcagtgaca | gcagcaat |      |
| SHap102   | tgacagcagc | gatagcagtg | acagcagcga | tagcagtgac        | agcagtgaca | gcagcaat |      |
| SHap130   | tgacagcagc | gatagcagtg | acagcagcga | t-----            | agcagtgaca | gcagcaat |      |
| SHap106   | tgacagcagc | gatagcagtg | acagcagcga | tagcagtgac        | agcagtgaca | gcagcaat |      |
| SHap72    | tgacagcagc | gatagcagtg | acagcagcga | tagcagtgac        | agcagtgaca | gcagcaat |      |
| SHap110   | tgacagcagc | gatagcagtg | acagcagcga | tagcagtgac        | agcagtgaca | gcagcaat |      |
| Merged    | tgacagcagc | gatagcagtg | acagcagcga | <b>tagcagtgac</b> | agcagtgaca | gcagcaat |      |
| Merged    | D S S      | D S S      | D S S D    | S S D             | S S D      | S S N    | 1056 |

**Notes:** Indel 7 (18 Nt) is in 7 unique McKnight haplotypes 26; 29; 32; 33; 1/7/16/35; and 37/38  
 Id5: c.3088\_3105delAGCAGTGACAGCAGCGAT; p.S1030\_D1035DELSDDSSD  
 Id5 (Song) is the same as Indel 7 (McKnight).  
 Id6: c.3142\_3150delAGCAGTGAC; p.1048\_1050delSSD  
 Id7: c.3168\_3169insAGCAGTGACAGCAGTGACAGCAGCGAC; p.N056\_S1057insSSDSSDSSD  
 c.3141delC or p.S1047fsX223; c.3141delC, dentin dysplasia phenotype (3); possibly this mutation was described improperly as this nucleotide is not a C. It should be c.3153delC and p.S1051fsX223.



Figure S1. Human DPP Alignment, p. 16

|           |                                              |            |            |            |      |
|-----------|----------------------------------------------|------------|------------|------------|------|
| RefSeq    | -----ag                                      | cagtgacagc | agtgacagca | gcgacagcag | 3200 |
| Hap3      | -----ag                                      | cagtgacagc | agtgacagca | gcgacagcag |      |
| Hap4      | -----ag                                      | cagtgacagc | agtgacagca | gcgacagcag |      |
| Hap5      | -----ag                                      | cagtgacagc | agtgacagca | gcgacagcag |      |
| Hap6      | -----ag                                      | cagtgacagc | agtgacagca | gcgacagcag |      |
| Hap8      | -----ag                                      | cagtgacagc | agtgacagca | gcgacagcag |      |
| Hap13     | -----ag                                      | cagtgacagc | agtgacagca | gcgacagcag |      |
| Hap14     | -----ag                                      | cagtgacagc | agtgacagca | gcgacagcag |      |
| Hap20     | -----ag                                      | cagtgacagc | agtgacagca | gcgacagcag |      |
| Hap22     | -----ag                                      | cagtgacagc | agtgacagca | gcgacagcag |      |
| Hap24     | -----ag                                      | cagtgacagc | agtgacagca | gcgacagcag |      |
| Hap25     | -----ag                                      | cagtgacagc | agtgacagca | gcgacagcag |      |
| Hap26     | -----ag                                      | cagtgacagc | agtgacagca | gcgacagcag |      |
| Hap28     | -----ag                                      | cagtgacagc | agtgacagca | gcgacagcag |      |
| Hap29     | -----ag                                      | cagtgacagc | agtgacagca | gcgacagcag |      |
| Hap31     | -----ag                                      | cagtgacagc | agtgacagca | gcgacagcag |      |
| Hap32     | -----ag                                      | cagtgacagc | agtgacagca | gcgacagcag |      |
| Hap33     | -----ag                                      | cagtgacagc | agtgacagca | gcgacagcag |      |
| Hap34     | -----ag                                      | cagtgacagc | agtgacagca | gcgacagcag |      |
| Hap35     | -----ag                                      | cagtgacagc | agtgacagca | gcgacagcag |      |
| Hap36     | -----ag                                      | cagtgacagc | agtgacagca | gcgacagcag |      |
| Hap37     | -----ag                                      | cagtgacagc | agtgacagca | gcgacagcag |      |
| Hap38     | -----ag                                      | cagtgacagc | agtgacagca | gcgacagcag |      |
| SHap1:    | -----ag                                      | cagtgacagc | agtgacagca | gcgacagcag |      |
| SHap2:    | -----ag                                      | cagtgacagc | agtgacagca | gcgacagcag |      |
| SHap3:    | -----ag                                      | cagtgacagc | agtgacagca | gcgacagcag |      |
| SHap4:    | -----ag                                      | cagtgacagc | agtgacagca | gcgacagcag |      |
| SHap5:    | -----ag                                      | cagtgacagc | agtgacagca | gcgacagcag |      |
| SHap6:    | -----ag                                      | cagtgacagc | agtgacagca | gcgacagcag |      |
| SHap6 (2) | -----ag                                      | cagtgacagc | agtgacagca | gcgacagcag |      |
| SHap7     | -----ag                                      | cagtgacagc | agtgacagca | gcgacagcag |      |
| SHap102   | -----ag                                      | cagtgacagc | agtgacagca | gcgacagcag |      |
| SHap130   | -----ag                                      | cagtgacagc | agtgacagca | gcgacagcag |      |
| SHap106   | agcagtgacagcagtgacagcagcgacag                | cagtgacagc | agtgacagca | gcgacagcag |      |
| SHap72    | -----ag                                      | cagtgacagc | agtgacagca | gcgacagcag |      |
| SHap110   | -----ag                                      | cagtgacagc | agtgacagca | gcgacagcag |      |
| Merged    | <b><u>agcagtgacagcagtgacagcagcgac</u></b> ag | cagtgacagc | agtgacagca | gcgacagcag |      |
| Merged    | <b>S S D S S D S S D S</b>                   | S D S      | S D S      | S D S S    | 1067 |

Notes: Id7: c.3168\_3169insAGCAGTGACAGCAGTGACAGCAGCGAC; p.N056\_S1057insSSDSSDSSD  
 Snp4: c.3221A>G; p.D1074G

Figure S1. Human DPP Alignment, p. 17

|           |            |            |                    |            |                 |            |      |
|-----------|------------|------------|--------------------|------------|-----------------|------------|------|
| RefSeq    | tgatagcagt | gacagcagtg | acagcagcga         | cagcagtgat | agcagtgaaa      | gcagtgatag | 3260 |
| Hap3      | tgatagcagt | gacagcagtg | acagcagcga         | cagcagtgat | agcagtgaaa      | gcagtgatag |      |
| Hap4      | tgatagcagt | gacagcagtg | acagcagcga         | cagcagtgat | agcagtgaaa      | gcagtgatag |      |
| Hap5      | tgatagcagt | gacagcagtg | acagcagcga         | cagcagtgat | agcagtgaaa      | gcagtgatag |      |
| Hap6      | tgatagcagt | gacagcagtg | acagcagcga         | cagcagtgat | agcagtgaaa      | gcagtgatag |      |
| Hap8      | tgatagcagt | gacagcagtg | acagcagcga         | cagcagtgat | agcagtgaca      | gcagtgatag |      |
| Hap13     | tgatagcagt | gacagcagtg | acagcagcga         | cagcagtgat | agcagtgaca      | gcagtgatag |      |
| Hap14     | tgatagcagt | gacagcagtg | acagcagcga         | cagcagtgat | agcagtgaaa      | gcagtgatag |      |
| Hap20     | tgatagcagt | gacagcagtg | acagcagcga         | cagcagtgat | agcagtgaaa      | gcagtgatag |      |
| Hap22     | tgatagcagt | gacagcagtg | acagcagcga         | cagcagtgat | agcagtgaca      | gcagtgatag |      |
| Hap24     | tgatagcagt | gacagcagtg | acagcagcga         | cagcagtgat | agcagtgaaa      | gcagtgatag |      |
| Hap25     | tgacagcagt | gacagcagtg | acagcagcga         | cagcagtgat | agcagtgaaa      | gcagtgatag |      |
| Hap26     | tgatagcagt | gacagcagtg | acagcagcga         | cagcagtgat | agcagtgaca      | gcagtgatag |      |
| Hap28     | tgatagcagt | gacagcagtg | acagcagcga         | cagcagtgat | agcagtgaaa      | gcagtgatag |      |
| Hap29     | tgatagcagt | gacagcagtg | acagcagcga         | cagcagtgat | agcagtgaca      | gcagtgatag |      |
| Hap31     | tgatagcagt | gacagcagtg | acagcagcga         | cagcagtgat | agcagtgaaa      | gcagtgatag |      |
| Hap32     | tgatagcagt | gacagcagtg | acagcagcga         | cagcagtgat | agcagtgaaa      | gcagtgatag |      |
| Hap33     | tgatagcagt | gacagcagtg | <b>g</b> cagcagcga | cagcagtgat | agcagtgaca      | gcagtgatag |      |
| Hap34     | tgatagcagt | gacagcagtg | acagcagcga         | cagcagtgat | agcagtgaca      | gcagtgatag |      |
| Hap35     | tgatagcagt | gacagcagtg | acagcagcga         | cagcagtgat | agcagtgaca      | gcagtgatag |      |
| Hap36     | tgatagcagt | gacagcagtg | acagcagcga         | cagcagtgat | agcagtgaaa      | gcagtgatag |      |
| Hap37     | tgatagcagt | gacagcagtg | acagcagcga         | cagcagtgat | agcagtgaca      | gcagtgatag |      |
| Hap38     | tgatagcagt | gacagcagtg | acagcagcga         | cagcagtgat | agcagtgaaa      | gcagtgatag |      |
| SHap1:    | tgatagcagt | gacagcagtg | acagcagcga         | cagcagtgat | agcagtgaca      | gcagtgatag |      |
| SHap2:    | tgatagcagt | gacagcagtg | acagcagcga         | cagcagtgat | agcagtgaaa      | gcagtgatag |      |
| SHap3:    | tgatagcagt | gacagcagtg | acagcagcga         | cagcagtgat | agcagtgaca      | gcagtgatag |      |
| SHap4:    | tgatagcagt | gacagcagtg | acagcagcga         | cagcagtgat | agcagtgaaa      | gcagtgatag |      |
| SHap5:    | tgatagcagt | gacagcagtg | <b>g</b> cagcagcga | cagcagtgat | agcagtgaca      | gcagtgatag |      |
| SHap6:    | tgatagcagt | gacagcagtg | <b>g</b> cagcagcga | cagcagtgat | agcagtgaca      | gcagtgatag |      |
| SHap6 (2) | tgatagcagt | gacagcagtg | <b>g</b> cagcagcga | cagcagtgat | agcagtgaca      | gcagtgatag |      |
| SHap7     | tgatagcagt | gacagcagtg | acagcagcga         | cagcagtgat | agcagtgaaa      | gcagtgatag |      |
| SHap102   | tgatagcagt | gacagcagtg | acagcagcga         | cagcagtgat | agcagtgaaa      | gcagtgatag |      |
| SHap130   | tgatagcagt | gacagcagtg | <b>g</b> cagcagcga | cagcagtgat | agcagtgaca      | gcagtgatag |      |
| SHap106   | tgatagcagt | gacagcagtg | <b>g</b> cagcagcga | cagcagtgat | agcagtgaca      | gcagtgatag |      |
| SHap72    | tgacagcagt | gacagcagtg | acagcagcga         | cagcagtgat | agcagtgaca      | gcagtgatag |      |
| SHap110   | tgatagcagt | gacagcagtg | acagcagcga         | cagcagtgat | agcagtgaaa      | gcagtgatag |      |
| Merged    | tgatagcagt | gacagcagtg | acagcagcga         | cagcagtgat | agcagtgaaa      | gcagtgatag |      |
| Merged    | D S S      | D S S      | D/ <b>G</b> S S D  | S S D      | S S E/ <b>D</b> | S S D S    | 1087 |

Notes: Snp5: c.3249A>C; p.E1083D  
 Snp6: c.3264T>C; p.S1088

Figure S1. Human DPP Alignment, p. 18

|           |                   |       |            |            |            |            |      |
|-----------|-------------------|-------|------------|------------|------------|------------|------|
| RefSeq    | cagtg [-----]     | acagc | agcaatagca | gtgacagcag | cgatagcagc | gacagcagcg | 3310 |
| Hap3      | cagtg [-----]     | acagc | agcaatagca | gtgacagcag | cgatagcagc | gacagcagcg |      |
| Hap4      | cagcg [-----]     | ----- | -----      | -----      | -----      | -----      |      |
| Hap5      | cagcg [-----]     | ----- | -----      | -----      | -----      | -----      |      |
| Hap6      | cagcg [-----]     | ----- | -----      | -----      | -----      | -----      |      |
| Hap8      | cagcg [-----]     | ----- | -----      | -----      | -----      | -----      |      |
| Hap13     | cagcg [-----]     | ----- | -----      | -----      | -----      | -----      |      |
| Hap14     | cagtg [-----]     | acagc | agcaatagca | gtgacagcag | cgatagcagc | gacagcagcg |      |
| Hap20     | cagcg [-----]     | ----- | -----      | -----      | -----      | -----      |      |
| Hap22     | cagcg [-----]     | ----- | -----      | -----      | -----      | -----      |      |
| Hap24     | cagtg [In 189 nt] | acagc | agcaatagca | gtgacagcag | cgatagcagc | gacagcagcg |      |
| Hap25     | cagtg [-----]     | acagc | agcaatagca | gtgacagcag | cgatagcagc | gacagcagcg |      |
| Hap26     | cagcg [-----]     | ----- | -----      | -----      | -----      | -----      |      |
| Hap28     | cagcg [-----]     | ----- | -----      | -----      | -----      | -----      |      |
| Hap29     | cagcg [-----]     | ----- | -----      | -----      | -----      | -----      |      |
| Hap31     | cagcg [-----]     | ----- | -----      | -----      | -----      | -----      |      |
| Hap32     | cagcg [-----]     | ----- | -----      | -----      | -----      | -----      |      |
| Hap33     | cagcg [-----]     | ----- | -----      | -----      | -----      | -----      |      |
| Hap34     | cagcg [-----]     | ----- | -----      | -----      | -----      | -----      |      |
| Hap35     | cagcg [-----]     | ----- | -----      | -----      | -----      | -----      |      |
| Hap36     | cagcg [-----]     | ----- | -----      | -----      | -----      | -----      |      |
| Hap37     | cagcg [-----]     | ----- | -----      | -----      | -----      | -----      |      |
| Hap38     | cagcg [-----]     | ----- | -----      | -----      | -----      | -----      |      |
| SHap1:    | cagcg [-----]     | ----- | -----      | -----      | -----      | -----      |      |
| SHap2:    | cagtg [-----]     | acagc | agcaatagca | gtgacagcag | cgatagcagc | gacagcagcg |      |
| SHap3:    | cagcg [-----]     | ----- | -----      | -----      | -----      | -----      |      |
| SHap4:    | cagcg [-----]     | ----- | -----      | -----      | -----      | -----      |      |
| SHap5:    | cagcg [-----]     | ----- | -----      | -----      | -----      | -----      |      |
| SHap6:    | cagcg [-----]     | ----- | -----      | -----      | -----      | -----      |      |
| SHap6 (2) | cagcg [-----]     | ----- | -----      | -----      | -----      | -----      |      |
| SHap7     | cagcg [-----]     | ----- | -----      | -----      | -----      | -----      |      |
| SHap102   | cagcg [-----]     | ----- | -----      | -----      | -----      | -----      |      |
| SHap130   | cagcg [-----]     | ----- | -----      | -----      | -----      | -----      |      |
| SHap106   | cagcg [-----]     | ----- | -----      | -----      | -----      | -----      |      |
| SHap72    | cagcg [-----]     | ----- | -----      | -----      | -----      | -----      |      |
| SHap110   | cagcg [-----]     | ----- | -----      | -----      | -----      | -----      |      |
| Merged    | cagtg [In 189 nt] | acagc | agcaatagca | gtgacagcag | cgatagcagc | gacagcagcg |      |
| Merged    | S [ 63 aa ]       | D S   | S N S      | S D S S    | D S S      | D S S      | 1103 |

**Notes:** Indel 8 (189 Nt): The insertion is only in Hap24. The sequence is shown below.

Indel 9 (54 Nt). The insertion is only in 4 unique haplotypes: 3; 14/RefSeq; 24; & 25.

Id8: c.3266\_3400del135bp; p.D1089\_S1133delDSSNSS(DSS)<sub>9</sub>NSS(DSS)<sub>3</sub>

Figure S1. Human DPP Alignment, p. 19

|           |                                                                        |                   |                   |                   |                   |                   |      |
|-----------|------------------------------------------------------------------------|-------------------|-------------------|-------------------|-------------------|-------------------|------|
| Hap24     | [189 nt insert]:                                                       |                   |                   |                   |                   |                   |      |
| Hap24     | <b>acagcagcaatagcagtgacagcagtgacagcagcgacagcagtgatagcagtgacagcagcg</b> |                   |                   |                   |                   |                   |      |
|           | D S S N S S D S S D S S D S S D S S D S S                              |                   |                   |                   |                   |                   |      |
| Hap24     | <b>atagcagtgacagcagtgacagcagcaatagcagtgacagcagtgacagcagcgacagcagtg</b> |                   |                   |                   |                   |                   |      |
|           | D S S D S S D S S N S S D S S D S S D S S                              |                   |                   |                   |                   |                   |      |
| Hap24     | <b>atagcagtgacagcagtgacagcagcgacagcagtgatagcagtgaaagcagtgatagcagtg</b> |                   |                   |                   |                   |                   |      |
|           | D S S D S S D S S D S S D S S E S S D S S                              |                   |                   |                   |                   |                   |      |
| Merged    | <b>acagcagcaatagcagtgacagcagtgacagcagcgacagcagtgatagcagtgacagcagcg</b> |                   |                   |                   |                   |                   |      |
| Merged    | D S S N S S D S S D S S D S S D S S D S S D S S                        |                   |                   |                   |                   |                   |      |
| Merged    | <b>atagcagtgacagcagtgacagcagcaatagcagtgacagcagtgacagcagcgacagcagtg</b> |                   |                   |                   |                   |                   |      |
| Merged    | D S S D S S D S S N S S D S S D S S D S S D S S                        |                   |                   |                   |                   |                   |      |
| Merged    | <b>atagcagtgacagcagtgacagcagcgacagcagtgatagcagtgaaagcagtgatagcagtg</b> |                   |                   |                   |                   |                   |      |
| Merged    | D S S D S S D S S D S S D S S E S S D S S                              |                   |                   |                   |                   |                   |      |
| RefSeq    | acagcagcga                                                             | tagcagtgac        | agcagcgata        | gcagtgacag        | cagtgacagc        | agcaatagca        | 3370 |
| Hap3      | acagcagcga                                                             | tagcagtgac        | agcagcgata        | gcagtgacag        | cagtgacagc        | agcaatagca        |      |
| Hap4      | -----                                                                  | -----             | -----             | -----             | -----             | -----             |      |
| Hap5      | -----                                                                  | -----             | -----             | -----             | -----             | -----             |      |
| Hap6      | -----                                                                  | -----             | -----             | -----             | -----             | -----             |      |
| Hap8      | -----                                                                  | -----             | -----             | -----             | -----             | -----             |      |
| Hap13     | -----                                                                  | -----             | -----             | -----             | -----             | -----             |      |
| Hap14     | acagcagcga                                                             | tagcagtgac        | agcagcgata        | gcagtgacag        | cagtgacagc        | agcaatagca        |      |
| Hap20     | -----                                                                  | -----             | -----             | -----             | -----             | -----             |      |
| Hap22     | -----                                                                  | -----             | -----             | -----             | -----             | -----             |      |
| Hap24     | acagcagcga                                                             | tagcagtgac        | agcagcgata        | gcagtgacag        | cagtgacagc        | agcaatagca        |      |
| Hap25     | acagcagcga                                                             | tagcagtgac        | agcagcgata        | gcagtgacag        | cagtgacagc        | agcaatagca        |      |
| Hap26     | -----                                                                  | -----             | -----             | -----             | -----             | -----             |      |
| Hap28     | -----                                                                  | -----             | -----             | -----             | -----             | -----             |      |
| Hap29     | -----                                                                  | -----             | -----             | -----             | -----             | -----             |      |
| Hap31     | -----                                                                  | -----             | -----             | -----             | -----             | -----             |      |
| Hap32     | -----                                                                  | -----             | -----             | -----             | -----             | -----             |      |
| Hap33     | -----                                                                  | -----             | -----             | -----             | -----             | -----             |      |
| Hap34     | -----                                                                  | -----             | -----             | -----             | -----             | -----             |      |
| Hap35     | -----                                                                  | -----             | -----             | -----             | -----             | -----             |      |
| Hap36     | -----                                                                  | -----             | -----             | -----             | -----             | -----             |      |
| Hap37     | -----                                                                  | -----             | -----             | -----             | -----             | -----             |      |
| Hap38     | -----                                                                  | -----             | -----             | -----             | -----             | -----             |      |
| SHap1:    | -----                                                                  | -----             | -----             | -----             | -----             | -----             |      |
| SHap2:    | acagcagcga                                                             | tagcagtgac        | agcagcgata        | gcagtgacag        | cagtgacagc        | agcaatagca        |      |
| SHap3:    | -----                                                                  | -----             | -----             | -----             | -----             | -----             |      |
| SHap4:    | -----                                                                  | -----             | -----             | -----             | -----             | -----             |      |
| SHap5:    | -----                                                                  | -----             | -----             | -----             | -----             | -----             |      |
| SHap6:    | -----                                                                  | -----             | -----             | -----             | -----             | -----             |      |
| SHap6 (2) | -----                                                                  | -----             | -----             | -----             | -----             | -----             |      |
| SHap7     | -----                                                                  | -----             | -----             | -----             | -----             | -----             |      |
| SHap102   | -----                                                                  | -----             | -----             | -----             | -----             | -----             |      |
| SHap130   | -----                                                                  | -----             | -----             | -----             | -----             | -----             |      |
| SHap106   | -----                                                                  | -----             | -----             | -----             | -----             | -----             |      |
| SHap72    | -----                                                                  | -----             | -----             | -----             | -----             | -----             |      |
| SHap110   | -----                                                                  | -----             | -----             | -----             | -----             | -----             |      |
| Merged    | <b>acagcagcga</b>                                                      | <b>tagcagtgac</b> | <b>agcagcgata</b> | <b>gcagtgacag</b> | <b>cagtgacagc</b> | <b>agcaatagca</b> |      |
| Merged    | D S S D                                                                | S S D             | S S D             | S S D S           | S D S             | S N S             | 1123 |

Note: Indel 10 (81 Nt)

Figure S1. Human DPP Alignment, p. 20

|           |                   |                   |                   |           |                     |            |      |
|-----------|-------------------|-------------------|-------------------|-----------|---------------------|------------|------|
| RefSeq    | gtgacagcag        | tgacagcagc        | gacagcagtg        | atagcagtg | cagcagcaac          | agcagtgaca | 3430 |
| Hap3      | gtgacagcag        | tgacagcagc        | gacagcagtg        | atagcagtg | cagcagcaac          | agcagtgaca |      |
| Hap4      | -----             | -----             | -----             | atagcagtg | cagcagc <b>g</b> ac | agcagtgaca |      |
| Hap5      | -----             | -----             | -----             | atagcagtg | cagcagc <b>g</b> ac | agcagtgaca |      |
| Hap6      | -----             | -----             | -----             | atagcagtg | cagcagc <b>g</b> ac | agcagtgaca |      |
| Hap8      | -----             | -----             | -----             | atagcagtg | cagcagc <b>g</b> ac | agcagtgaca |      |
| Hap13     | -----             | -----             | -----             | atagcagtg | cagcagc <b>g</b> ac | agcagtgaca |      |
| Hap14     | gtgacagcag        | tgacagcagc        | gacagcagtg        | atagcagtg | cagcagcaac          | agcagtgaca |      |
| Hap20     | -----             | -----             | -----             | atagcagtg | cagcagc <b>g</b> ac | agcagtgaca |      |
| Hap22     | -----             | -----             | -----             | atagcagtg | cagcagc <b>g</b> ac | agcagtgaca |      |
| Hap24     | gtgacagcag        | tgacagcagc        | gacagcagtg        | atagcagtg | cagcagcaac          | agcagtgaca |      |
| Hap25     | gtgacagcag        | tgacagcagc        | gacagcagtg        | atagcagtg | cagcagcaac          | agcagtgaca |      |
| Hap26     | -----             | -----             | -----             | atagcagtg | cagcagc <b>g</b> ac | agcagtgaca |      |
| Hap28     | -----             | -----             | -----             | atagcagtg | cagcagc <b>g</b> ac | agcagtgaca |      |
| Hap29     | -----             | -----             | -----             | atagcagtg | cagcagc <b>g</b> ac | agcagtgaca |      |
| Hap31     | -----             | -----             | -----             | atagcagtg | cagcagc <b>g</b> ac | agcagtgaca |      |
| Hap32     | -----             | -----             | -----             | atagcagtg | cagcagc <b>g</b> ac | agcagtgaca |      |
| Hap33     | -----             | -----             | -----             | atagcagtg | cagcagc <b>g</b> ac | agcagtgaca |      |
| Hap34     | -----             | -----             | -----             | atagcagtg | cagcagc <b>g</b> ac | agcagtgaca |      |
| Hap35     | -----             | -----             | -----             | atagcagtg | cagcagc <b>g</b> ac | agcagtgaca |      |
| Hap36     | -----             | -----             | -----             | atagcagtg | cagcagc <b>g</b> ac | agcagtgaca |      |
| Hap37     | -----             | -----             | -----             | atagcagtg | cagcagc <b>g</b> ac | agcagtgaca |      |
| Hap38     | -----             | -----             | -----             | atagcagtg | cagcagc <b>g</b> ac | agcagtgaca |      |
| SHap1:    | -----             | -----             | -----             | atagcagtg | cagcagc <b>g</b> ac | agcagtgaca |      |
| SHap2:    | gtgacagcag        | tgacagcagc        | gacagcagtg        | atagcagtg | cagcagcaac          | agcagtgaca |      |
| SHap3:    | -----             | -----             | -----             | atagcagtg | cagcagc <b>g</b> ac | agcagtgaca |      |
| SHap4:    | -----             | -----             | -----             | atagcagtg | cagcagc <b>g</b> ac | agcagtgaca |      |
| SHap5:    | -----             | -----             | -----             | atagcagtg | cagcagc <b>g</b> ac | agcagtgaca |      |
| SHap6:    | -----             | -----             | -----             | atagcagtg | cagcagc <b>g</b> ac | agcagtgaca |      |
| SHap6 (2) | -----             | -----             | -----             | atagcagtg | cagcagc <b>g</b> ac | agcagtgaca |      |
| SHap7     | -----             | -----             | -----             | atagcagtg | cagcagc <b>g</b> ac | agcagtgaca |      |
| SHap102   | -----             | -----             | -----             | atagcagtg | cagcagc <b>g</b> ac | agcagtgaca |      |
| SHap130   | -----             | -----             | -----             | atagcagtg | cagcagc <b>g</b> ac | agcagtgaca |      |
| SHap106   | -----             | -----             | -----             | atagcagtg | cagcagc <b>g</b> ac | agcagtgaca |      |
| SHap72    | -----             | -----             | -----             | atagcagtg | cagcagc <b>g</b> ac | agcagtgaca |      |
| SHap110   | -----             | -----             | -----             | atagcagtg | cagcagc <b>g</b> ac | agcagtgaca |      |
| Merged    | <b>gtgacagcag</b> | <b>tgacagcagc</b> | <b>gacagcagtg</b> | atagcagtg | cagcagcaac          | agcagtgaca |      |
| Merged    | S D S S           | D S S             | D S S             | D S S D   | S S N               | S S D      | 1143 |

Note: Snp7 is c.3418A>G; p.N1140D.

|           |            |                                       |                     |                    |      |
|-----------|------------|---------------------------------------|---------------------|--------------------|------|
| RefSeq    | gcagtgacag | cagtgaa-----agc                       | agcgacagca          | gtgacagcag         | 3470 |
| Hap3      | gcagtgacag | cagtgaa-----agc                       | agcgacagca          | gtgacagcag         |      |
| Hap4      | gcagtgacag | cagtgaa-----agc                       | agcgacagca          | gtgacagcag         |      |
| Hap5      | gcagtgacag | cagtgaa-----agc                       | agcgacagca          | gtgacagcag         |      |
| Hap6      | gcagtgacag | cagtgaa-----agc                       | agcgacagca          | gtgacagcag         |      |
| Hap8      | gcagtgacag | cagtgaaagcagcgacagcagcgatagc          | agcgacagca          | gtgacagcag         |      |
| Hap13     | gcagcgacag | ca-----gcgatagc                       | agcgacagca          | gtgac-----         |      |
| Hap14     | gcagtgacag | cagtgaa-----agc                       | agcgacagca          | gtgacagcag         |      |
| Hap20     | gcagtgacag | cagtgaa-----agc                       | agcgacagca          | gtgacagcag         |      |
| Hap22     | gcagtgacag | cagtgaaagcagcgacagcagcgatagc          | agcgacagca          | gtgacagcag         |      |
| Hap24     | gcagtgacag | cagtgaa-----agc                       | agcgacagca          | gtgacagcag         |      |
| Hap25     | gcagtgacag | cagtgaa-----agc                       | agcgacagca          | gtgacagcag         |      |
| Hap26     | gcagtgacag | cagtgaaagcagcgacagcagcgatagc          | agcgacagca          | gtgacagcag         |      |
| Hap28     | gcagtgacag | cagtgaa-----agc                       | agcgacagca          | gtgacagcag         |      |
| Hap29     | gcagtgacag | cagtgaaagcagcgacagcagcgatagc          | agcgacagca          | gtgacagcag         |      |
| Hap31     | gcagtgacag | cagtgaa-----agc                       | agcgacagca          | gtgacagcag         |      |
| Hap32     | gcagtgacag | cagtgaa-----agc                       | agcgacagca          | gtgacagcag         |      |
| Hap33     | gcagtgacag | cagtgaaagcagcgacagcagcgatagc          | agcgacagca          | gtgacagcag         |      |
| Hap34     | gcagtgacag | cagtgaaagcagcgacagcagcgatagc          | agcgacagca          | gtgac-----         |      |
| Hap35     | gcagtgacag | cagtgaaagcagcgacagcagcgatagc          | agcgacagca          | gtgacagcag         |      |
| Hap36     | gcagtgacag | cagtgaa-----agc                       | agcgacagca          | gtgacagcag         |      |
| Hap37     | gcagtgacag | cagtgaaagcagcgacagcagcgatagc          | agcgacagca          | gtgacagcag         |      |
| Hap38     | gcagtgacag | cagtgaa-----agc                       | agcgacagca          | gtgacagcag         |      |
| SHap1:    | gcagtgacag | cagtgaaagcagcgacagcagcgatagc          | agcgacagca          | gtgacagcag         |      |
| SHap2:    | gcagtgacag | cagtgaa-----agc                       | agcgacagca          | gtgacagcag         |      |
| SHap3:    | gcagtgacag | cagtgaaagcagcgacagcagcgatagc          | agcgacagca          | gtgacagcag         |      |
| SHap4:    | gcagtgacag | cagtgaaagcagcgacagcagcgatagc          | agc <b>aa</b> cagca | gtgacagcag         |      |
| SHap5:    | gcagtgacag | cagtgaaagcagcgacagcagcgatagc          | agcgacagca          | gtgacagcag         |      |
| SHap6:    | gcagtgacag | cagtgaaagcagcgacagcagcgatagc          | agcgacagca          | gtgacagcag         |      |
| SHap6 (2) | gcagtgacag | cagtgaaagcagcgacagcagcgatagc          | agcgacagca          | gtgacagcag         |      |
| SHap7     | gcagtgacag | cagtgaaagcagcgacagcagcgatagc          | agc <b>aa</b> cagca | gtgacagcag         |      |
| SHap102   | gcagtgacag | cagtgaaagcagcgacagcagcgatagc          | agcgacagca          | gtgacagcag         |      |
| SHap130   | gcagtgacag | cagtgaaagcagcgacagcagcgatagc          | agcgacagca          | gtgacagcag         |      |
| SHap106   | gcagtgacag | cagtgaaagcagcgacagcagcgatagc          | agcgacagca          | gtgacagcag         |      |
| SHap72    | gcagtgacag | cagtgaa-----agc                       | agcgacagca          | gtgac-----         |      |
| SHap110   | gcagtgacag | cagtgaaagcagcgacagcagcgatagc          | agc <b>aa</b> cagca | gtgacagcag         |      |
| Merged    | gcagtgacag | cagtgaa <u>agcagcgacagcagcgat</u> agc | agcgacagca          | gtgac <b>agcag</b> |      |
| Merged    | S S D S    | S E <b>S S D S S D</b> S              | S D/ <b>N</b> S     | S D S S            | 1157 |

**Notes:** Dentinogenesis imperfecta type II mutation c.3438delC; p.D1146fsX1313 (Song).  
 Indel 10 (18 Nt) and is in a slightly different place in Hap13.  
 Id9: c.3447\_3448insAGCAGCGACAGCAGCGAT; p. E1149\_S1150insSSDSSD.  
 Id9 (Song) is the same as Indel 10 (McKnight).  
 Snp8: c.3454G>A; p.D1152N

|           |                             |                   |            |            |            |      |
|-----------|-----------------------------|-------------------|------------|------------|------------|------|
| RefSeq    | cgacagcagtgacagcagcg        | atagcagcga        | cagcagcgac | agcagcgata | gcagtgacag | 3530 |
| Hap3      | cgacagcagtgacagcagcg        | atagcagcga        | cagcagcgac | agcagcgata | gcagtgacag |      |
| Hap4      | cgacagcagtgacagcagcg        | atagcagcga        | cagcagcgac | agcagcgata | gcagtgacag |      |
| Hap5      | cgacagcagtgacagcagcg        | atagcagcga        | cagcagcgac | agcagcgata | gcagtgacag |      |
| Hap6      | cgacagcagtgacagcagcg        | atagcagcga        | cagcagcgac | agcagcgata | gcagtgacag |      |
| Hap8      | cgacagcagtgacagcagcg        | atagcagcga        | cagcagcgac | agcagcgata | gcagtgacag |      |
| Hap13     | -----                       | --agcagcga        | cagcagcgac | agcagcgata | gcagtgacag |      |
| Hap14     | cgacagcagtgacagcagcg        | atagcagcga        | cagcagcgac | agcagcgata | gcagtgacag |      |
| Hap20     | cgacagcagtgacagcagcg        | atagcagcga        | cagcagcgac | agcagcgata | gcagtgacag |      |
| Hap22     | cgacagcagtgacagcagcg        | atagcagcga        | cagcagcgac | agcagcgata | gcagtgacag |      |
| Hap24     | cgacagcagtgacagcagcg        | atagcagcga        | cagcagcgac | agcagcgata | gcagtgacag |      |
| Hap25     | cgacagcagtgacagcagcg        | atagcagcga        | cagcagcgac | agcagcgata | gcagtgacag |      |
| Hap26     | cgacagcagtgacagcagcg        | atagcagcga        | cagcagcgac | agcagcgata | gcagtgacag |      |
| Hap28     | cgacagcagtgacagcagcg        | atagcagcga        | cagcagcgac | agcagcgata | gcagtgacag |      |
| Hap29     | cgacagcagtgacagcagcg        | atagcagcga        | cagcagcgac | agcagcgata | gcagtgacag |      |
| Hap31     | cgacagcagtgacagcagcg        | atagcagcga        | cagcagcgac | agcagcgata | gcagtgacag |      |
| Hap32     | cgacagcagtgacagcagcg        | atagcagcga        | cagcagcgac | agcagcgata | gcagtgacag |      |
| Hap33     | cgacagcagtgacagcagcg        | atagcagcga        | cagcagcgac | agcagcgata | gcagtgacag |      |
| Hap34     | -----                       | --agcagcga        | cagcagcgac | agcagcgata | gcagtgacag |      |
| Hap35     | cgacagcagtgacagcagcg        | atagcagcga        | cagcagcgac | agcagcgata | gcagtgacag |      |
| Hap36     | cgacagcagtgacagcagcg        | atagcagcga        | cagcagcgac | agcagcgata | gcagtgacag |      |
| Hap37     | cgacagcagtgacagcagcg        | atagcagcga        | cagcagcgac | agcagcgata | gcagtgacag |      |
| Hap38     | cgacagcagtgacagcagcg        | atagcagcga        | cagcagcgac | agcagcgata | gcagtgacag |      |
| SHap1:    | cgacagcagtgacagcagcg        | atagcagcga        | cagcagcgac | agcagcgata | gcagtgacag |      |
| SHap2:    | cgacagcagtgacagcagcg        | atagcagcga        | cagcagcgac | agcagcgata | gcagtgacag |      |
| SHap3:    | cgacagcagtgacagcagcg        | atagcagcga        | cagcagcgac | agcagcgata | gcagtgacag |      |
| SHap4:    | cgacagcagtgacagcagcg        | atagcagcga        | cagcagcgac | agcagcgata | gcagtgacag |      |
| SHap5:    | cgacagcagtgacagcagcg        | atagcagcga        | cagcagcgac | agcagcgata | gcagtgacag |      |
| SHap6:    | cgacagcagtgacagcagcg        | atagcagcga        | cagcagcgac | agcagcgata | gcagtgacag |      |
| SHap6 (2) | cgacagcagtgacagcagcg        | atagcagcga        | cagcagcgac | agcagcgata | gcagtgacag |      |
| SHap7     | cgacagcagtgacagcagcg        | atagcagcga        | cagcagcgac | agcagcgata | gcagtgacag |      |
| SHap102   | cgacagcagtgacagcagcg        | atagcagcga        | cagcagcgac | agcagcgata | gcagtgacag |      |
| SHap130   | cgacagcagtgacagcagcg        | atagcagcga        | cagcagcgac | agcagcgata | gcagtgacag |      |
| SHap106   | cgacagcagtgacagcagcg        | atagcagcga        | cagcagcgac | agcagcgata | gcagtgacag |      |
| SHap72    | -----                       | --agcagcga        | cagcagcgac | agcagcgata | gcagtgacag |      |
| SHap110   | cgacagcagtgacagcagcg        | atagcagcga        | cagcagcgac | agcagcgata | gcagtgacag |      |
| Merged    | <b>cgacagcagtgacagcagcg</b> | <b>atagcagcga</b> | cagcagcgac | agcagcgata | gcagtgacag |      |
| Merged    | D S S D S S                 | D S S D           | S S D      | S S D      | S S D S    | 1177 |

**Notes:** Indel 11 (27 Nt) is only in 2 unique McKnight haplotypes: 13 and 10/12/15/17/18/34.

Id10: c.3466\_3492delAGCAGCGACAGCAGTGACAGCAGCGAT

Id10 (Song) is the same as Indel 11 (McKnight).

|           |                    |                    |            |                    |                   |                   |      |
|-----------|--------------------|--------------------|------------|--------------------|-------------------|-------------------|------|
| RefSeq    | cagcaatagc         | agtga <b>tagca</b> | gcgacagcag | tgatagcagt         | gacagcagcg        | <b>acagcagcga</b> | 3590 |
| Hap3      | cagcaatagc         | agtgatagca         | gcgacagcag | tgatagcag <b>c</b> | gacagcagtg        | acagcagcga        |      |
| Hap4      | cagcaatagc         | agtgatagca         | gcgacagcag | tgac-----          | ---agcagtg        | acagcagcga        |      |
| Hap5      | cagcaatagc         | agtgatagca         | gcgacagcag | tgac-----          | ---agcagtg        | acagcagcga        |      |
| Hap6      | cagcaatagc         | agtgatagca         | gcgacagcag | tgac-----          | ---agcagtg        | acagcagcga        |      |
| Hap8      | cagcaatagc         | agtgatagca         | gcgacagcag | tgatagcagt         | gacagcagcg        | acagcagcga        |      |
| Hap13     | cagcaatagc         | agtgatagca         | gcgacagcag | tgatagcag <b>c</b> | gacagcagcg        | acagcagcga        |      |
| Hap14     | cagcaatagc         | agtgatagca         | gcgacagcag | tgatagcagt         | gacagcagcg        | acagcagcga        |      |
| Hap20     | cagcaatagc         | agtgatagca         | gcgacagcag | tgacagcagt         | gacagcagcg        | acagcagcga        |      |
| Hap22     | cagcaatagc         | agtgatagca         | gcgacagcag | tgatagcagt         | gacagcagcg        | acagcagcga        |      |
| Hap24     | cagcaatagc         | agtgatagca         | gcgacagcag | tgatagcagt         | gacagcagcg        | acagcagcga        |      |
| Hap25     | cagcaatagc         | agtgatagca         | gcgacagcag | tgatagcagt         | gacagcagcg        | acagcagcga        |      |
| Hap26     | cagcaatagc         | agtgatagca         | gcgacagcag | tgatagcagt         | gacagcagcg        | acagcagcga        |      |
| Hap28     | cagcaatagc         | agtgatagca         | gcgacagcag | tgatagcagt         | gacagcagcg        | acagcagcga        |      |
| Hap29     | cagcaatagc         | agtgatagca         | gcgacagcag | tgatagcagt         | gacagcagcg        | acagcagcga        |      |
| Hap31     | cagcaatagc         | agtgatagca         | gcgacagcag | tgacagcagt         | gacagcagcg        | acagcagcga        |      |
| Hap32     | cagcaatagc         | agtgatagca         | gcgacagcag | tgatagcagt         | gacagcagcg        | acagcagcga        |      |
| Hap33     | cagcaatagc         | agtgatagca         | gcgacagcag | tgatagcagt         | gacagcagcg        | acagcagcga        |      |
| Hap34     | cagcaatagc         | agtgatagca         | gcgacagcag | tgatagcag <b>c</b> | gacagcagcg        | acagcagcga        |      |
| Hap35     | cagcaatagc         | agtgatagca         | gcgacagcag | tgatagcagt         | gacagcagcg        | acagcagcga        |      |
| Hap36     | cagc <b>gacagc</b> | agtgatagca         | gcgacagcag | tgacagcagt         | gacagcagcg        | acagcagcga        |      |
| Hap37     | cagcaatagc         | agtgatagca         | gcgacagcag | tgatagcagt         | gacagcagcg        | acagcagcga        |      |
| Hap38     | cagcaatagc         | agtgatagca         | gcgacagcag | tgatagcagt         | gacagcagcg        | acagcagcga        |      |
| SHap1:    | cagcaatagc         | agtgatagca         | gcgacagcag | tgatagcagt         | gacagcagcg        | acagcagcga        |      |
| SHap2:    | cagcaatagc         | agtgatagca         | gcgacagcag | tgatagcagt         | gacagcagcg        | acagcagcga        |      |
| SHap3:    | cagcaatagc         | agtgatagca         | gcgacagcag | tgatagcag <b>c</b> | gacagcagcg        | acagcagcga        |      |
| SHap4:    | cagcaatagc         | agtgatagca         | gcgacagcag | tgatagcagt         | gacagcagcg        | acagcagcga        |      |
| SHap5:    | cagcaatagc         | agtgatagca         | gcgacagcag | tgatagcagt         | gacagcagcg        | acagcagcga        |      |
| SHap6:    | cagcaatagc         | agtgatagca         | gcgacagcag | tgatagcagt         | gacagcagcg        | acagcagcga        |      |
| SHap6 (2) | cagcaatagc         | agtgatagca         | gcgacagcag | tgatagcagt         | gacagcagcg        | acagcagcga        |      |
| SHap7     | cagcaatagc         | agtgatagca         | gcgacagcag | tgatagcagt         | gacagcagcg        | acagcagcga        |      |
| SHap102   | cagcaatagc         | agtgatagca         | gcgacagcag | tgatagcagt         | gacagcagcg        | acagcagcga        |      |
| SHap130   | cagcaatagc         | agtgatagca         | gcgacagcag | tgatagcagt         | gacagcagcg        | acagcagcga        |      |
| SHap106   | cagcaatagc         | agtgatagca         | gcgacagcag | tgatagcagt         | gacagcagcg        | acagcagcga        |      |
| SHap72    | cagcaatagc         | agtgatagca         | gcgacagcag | tgat-----          | ---agcagtg        | acagcagcga        |      |
| SHap110   | cagcaatagc         | agtgatagca         | gcgacagcag | tgatagcagt         | gacagcagcg        | acagcagcga        |      |
| Dong:     |                    |                    |            |                    | agcagcga          | tagcagcgac        |      |
| Merged    | cagcaatagc         | agtgatagca         | gcgacagcag | tgat <b>agcagt</b> | <b>gacagcagcg</b> | acagcagcga        |      |
| Merged    | S N S              | S D S              | S D S S    | D S S              | D S S             | D S S D           | 1197 |

**Notes:** Dentinogenesis imperfecta type II mutation c.3546delTAGCAinsG; p.D1182fsX1312 (Song).  
 Indel 12 (9 Nt) is in haplotypes 4, 5, and 8  
 Id11: c.3565\_3573delAGCAGTGAC; p.S1189\_D1191delSSD  
 Id11 (Song) is the same as Indel 12 (McKnight).  
 Snp9: c.3570T>C; p.S1190  
 Dentinogenesis imperfecta type II mutation c.3560delG; p.S1187fsX1270 (Lee:ClinGenet).  
 Dentin dysplasia II mutation c.3582-3591delCAGCAGCGAT; p.D1194EfsX1310 (Nieminen, kind. 11).



Figure S1. Human DPP Alignment, p. 24

|           |            |            |            |                                        |      |
|-----------|------------|------------|------------|----------------------------------------|------|
| RefSeq    | tagcagcgac | agcagcgata | gtagtgatag | ca-----gtgacagc                        | 3630 |
| Hap3      | tagcagcgac | agcagcgata | gcagcgacag | cagcgatagtagtgatagcagtgacagc           |      |
| Hap4      | tagcagcgac | agcagtgaca | gtagtgatag | ca-----                                |      |
| Hap5      | tagcagcgac | agcagtgaca | gtagtgatag | ca-----                                |      |
| Hap6      | tagcagcgac | agcagtgaca | gtagtgatag | ca-----                                |      |
| Hap8      | tagcagcgac | agcagtgata | gtagtgatag | ca-----                                |      |
| Hap13     | cagcagcgac | agcagtgata | gtagtgatag | ca-----                                |      |
| Hap14     | tagcagcgac | agcagcgata | gtagtgatag | ca-----gtgacagc                        |      |
| Hap20     | tagcagcgac | agcagtgaca | gtagtgatag | ca-----                                |      |
| Hap22     | tagcagcgac | agcagtgata | gtagtgatag | ca-----gtgacagc                        |      |
| Hap24     | tagcagcgac | agcagcgata | gtagtgatag | ca-----gtgacagc                        |      |
| Hap25     | tagcagcgac | agcagcgata | gtagtgatag | ca-----gtgacagc                        |      |
| Hap26     | tagcagcgac | agcagtgata | gtagtgatag | ca-----                                |      |
| Hap28     | tagcagcgac | agcagcgata | gtagtgatag | ca-----gtgacagc                        |      |
| Hap29     | tagcagcgac | agcagtgata | gtagtgatag | ca-----gtgacagc                        |      |
| Hap31     | tagcagcgac | agcagtgaca | gtagtgatag | ca-----                                |      |
| Hap32     | tagcagcgac | agcagtgata | gtagtgatag | ca-----                                |      |
| Hap33     | tagcagcgac | agcagtgata | gtagtgatag | ca-----gtgacagc                        |      |
| Hap34     | cagcagcgac | agcagtgata | gtagtgatag | ca-----gtgacagc                        |      |
| Hap35     | tagcagcgac | agcagtgata | gtagtgatag | ca-----gtgacagc                        |      |
| Hap36     | tagcagcgac | agcagtgaca | gtagtgatag | ca-----                                |      |
| Hap37     | tagcagcgac | agcagtgata | gtagtgatag | ca-----gtgacagc                        |      |
| Hap38     | tagcagcgac | agcagtgata | gtagtgatag | ca-----                                |      |
| SHap1:    | tagcagcgac | agcagtgata | gtagtgatag | ca-----gtgacagc                        |      |
| SHap2:    | tagcagcgac | agcagcgata | gtagtgatag | ca-----gtgacagc                        |      |
| SHap3:    | cagcagcgac | agcagtgata | gtagtgatag | ca-----gtgacagc                        |      |
| SHap4:    | tagcagcgac | agcagcgata | gtagtgatag | ca-----gtgacagc                        |      |
| SHap5:    | tagcagcgac | agcagtgata | gtagtgatag | ca-----                                |      |
| SHap6:    | tagcagcgac | agcagtgata | gtagtgatag | ca-----gtgacagc                        |      |
| SHap6 (2) | tagcagcgac | agcagtgata | gtagtgatag | ca-----gtgacagc                        |      |
| SHap7     | tagcagcgac | agcagcgata | gtagtgatag | ca-----gtgacagc                        |      |
| SHap102   | tagcagcgac | agcagtgata | gtagtgatag | ca-----                                |      |
| SHap130   | tagcagcgac | agcagtgata | gtagtgatag | ca-----gtgacagc                        |      |
| SHap106   | tagcagcgac | agcagtgata | gtagtgatag | ca-----gtgacagc                        |      |
| SHap72    | cagcagcgac | agcagtgata | gtagtgatag | ca-----gtgacagc                        |      |
| SHap110   | tagcagcgac | agcagcgata | gtagtgatag | ca-----                                |      |
| Dong:     | tagcagcgac | agcagtgata | gtagtgatag | ca-----                                |      |
| Merged    | tagcagcgac | agcagcgata | gtagtgatag | ca <u>cagcgatagtagtgatagcagtgacagc</u> |      |
| Merged    | S S D      | S S D      | S S D S    | <u>S D S S D S</u> S D S               | 1210 |

Notes: Snp10: c.3591T>C; p.D1197

Snp11: c.3606C>T; p.S1202

Overlapping Indels that start at the same position but vary in length:

--Indel 13 (18 Nt): RefSeq/14; 10/12/15/17/18/34; 19/21/22; 23/28; 24; 25; 29; 33; 1/7/16/35; 37;& 38

--Indel 14 (27 Nt): 13 & 26.

--Indel 15 (36 Nt): 4; 5; 6; 8; 11/20; 30/36; 27/31; & 32.

--Indel 16 (54 Nt): is only in haplotype 38; This is a deletion of 36 Nt relative to the wild type and is part of the polymorphism in the DGI-III family (6).

Id12: c.3623\_3640delGTGACAGCAGTGACAGCA; p.S1208\_S1219delSDSSDS

Id12 (Song) is the same as Indel 15 (McKnight).

Id13: c3641\_3658delGCGACAGCAGTGACAGCA; p.SDSSDS

Id12 + Id13 (Song) together are the same as Indel 16 (McKnight).

Dentin dysplasia II mutation c.3625-3700del 76 bp; p.D1209AfsX1288 (Nieminen, kindred 12).

|           |                   |                    |                   |                    |                   |                    |      |
|-----------|-------------------|--------------------|-------------------|--------------------|-------------------|--------------------|------|
| RefSeq    | <b>agtgacagca</b> | <b>gcgacagcag</b>  | <b>tgacagcagc</b> | <b>gacagcagtg</b>  | <b>acagcagcga</b> | <b>cagcagtgac</b>  | 3690 |
| Hap3      | agtgacagca        | gcgacagcag         | tgacagcagc        | gacagcagtg         | acagcagcga        | cagcagtgac         |      |
| Hap4      | -----             | gcgacagcag         | tgacagcagc        | gacagcagtg         | acagcagcga        | cagcagtgac         |      |
| Hap5      | -----             | gcgacagcag         | tgacagcagc        | gacagcagtg         | acagcagcga        | cagcagtgac         |      |
| Hap6      | -----             | gcgacagcag         | tgacagcagc        | gacagcagtg         | acagcagcga        | cagcagtgac         |      |
| Hap8      | -----             | <b>g</b> tgacagcag | tgacagcagc        | gacagcagtg         | acagcagcga        | cagcagtgac         |      |
| Hap13     | -gtgacagca        | <b>g</b> tgacagcag | tgacagcagc        | gacagcagtg         | acagcagcga        | cagcagt <b>ggc</b> |      |
| Hap14     | agtgacagca        | gcgacagcag         | tgacagcagc        | gacagcagtg         | acagcagcga        | cagcagtgac         |      |
| Hap20     | -----             | gcgacagcag         | tgacagcagc        | gacagcagtg         | acagcagcga        | cagcagtgac         |      |
| Hap22     | agtgacagca        | gcgacagcag         | tgacagcagc        | gacagcagtg         | acagcagcga        | cagcagtgac         |      |
| Hap24     | agtgacagca        | gcgacagcag         | tgacagcagc        | gacagcagtg         | acagcagcga        | cagcagtgac         |      |
| Hap25     | agtgacagca        | gcgacagcag         | tgacagcagc        | <b>a</b> acagcagtg | acagcagcga        | cagcagtgac         |      |
| Hap26     | -gtgacagca        | <b>g</b> tgacagcag | tgacagcagc        | gacagcagtg         | acagcagcga        | cagcagtgac         |      |
| Hap28     | agtgacagca        | gcgacagcag         | tgacagcagc        | gacagcagtg         | acagcagcga        | cagcagtgac         |      |
| Hap29     | agtgacagca        | gcgacagcag         | tgacagcagc        | gacagcagtg         | acagcagcga        | cagcagtgac         |      |
| Hap31     | -----             | gcgacagcag         | tgacagcagc        | gacagcagtg         | acagcagcga        | cagcagtgac         |      |
| Hap32     | -----             | gcgacagcag         | tgacagcagc        | gacagcagtg         | acagcagcga        | cagcagtgac         |      |
| Hap33     | agtgacagca        | gcgacagcag         | tgacagcagc        | -----              | -----             | -----              |      |
| Hap34     | agtgacagca        | gcgacagcag         | tgacagcagc        | gacagcagtg         | acagcagcga        | cagcagtgac         |      |
| Hap35     | agtgacagca        | gcgacagcag         | tgacagcagc        | gacagcagtg         | acagcagcga        | cagcagtgac         |      |
| Hap36     | -----             | gcgacagcag         | tgacagcagc        | gacagcagtg         | acagcagcga        | cagcagtgac         |      |
| Hap37     | agtgacagca        | gcgacagcag         | tgacagcagc        | gacagcagtg         | acagcagcga        | cagcagtgac         |      |
| Hap38     | -----             | -----              | -----gc           | gacagcagtg         | acagcagcga        | cagcagtgac         |      |
| SHap1:    | agtgacagca        | gcgacagcag         | tgacagcagc        | gacagcagtg         | acagcagcga        | cagcagtgac         |      |
| SHap2:    | agtgacagca        | gcgacagcag         | tgacagcagc        | gacagcagtg         | acagcagcga        | cagcagtgac         |      |
| SHap3:    | agtgacagca        | gcgacagcag         | tgacagcagc        | gacagcagtg         | acagcagcga        | cagcagtgac         |      |
| SHap4:    | agtgacagca        | gcgacagcag         | tgacagcagc        | gacagcagtg         | acagcagcga        | cagcagtgac         |      |
| SHap5:    | -----             | <b>g</b> tgacagcag | tgacagcagc        | gacagcagtg         | acagcagcga        | cagcagtgac         |      |
| SHap6:    | agtgacagca        | gcgacagcag         | tgacagcagc        | gacagcagtg         | acagcagcga        | cagcagtgac         |      |
| SHap6 (2) | agtgacagca        | gcgacagcag         | tgacagcagc        | gacagcagtg         | acagcagcga        | cagcagtgac         |      |
| SHap7     | agtgacagca        | gcgacagcag         | tgacagcagc        | gacagcagtg         | acagcagcga        | cagcagtgac         |      |
| SHap102   | -----             | gcgacagcag         | tgacagcagc        | gacagcagtg         | acagcagcga        | cagcagtgac         |      |
| SHap130   | agtgacagca        | gcgacagcag         | tgacagcagc        | gacagcagtg         | acagcagcga        | cagcagtgac         |      |
| SHap106   | agtgacagca        | gcgacagcag         | tgacagcagc        | gacagcagtg         | acagcagcga        | cagcagtgac         |      |
| SHap72    | agtgacagca        | gcgacagcag         | tgacagcagc        | gacagcagtg         | acagcagcga        | cagcagtgac         |      |
| SHap110   | -----             | <b>g</b> tgacagcag | tgacagcagc        | gacagcagtg         | acagcagcga        | cagcagtgac         |      |
| Dong      | -----             | -----              | -----gc           | gacagcagtg         | acagcagcga        | cagcagtgac         |      |
| Merged    | <b>agtgacagca</b> | <b>gcgacagcag</b>  | <b>tgacagcagc</b> | <b>gacagcagtg</b>  | <b>acagcagcga</b> | <b>cagcagtgac</b>  |      |
| Merged    | S D S             | S D S S            | D S S             | D S S              | D S S D           | S S D              | 1230 |

**Notes:** Dentin dysplasia II mutation c.3625-3700del76 bp; p.D1209AfsX1288 (Nieminen, kindred 12).  
 Id13: c3641\_3658delGCGACAGCAGTGACAGCA; p.SDSSDS  
 Indel 17 (117 Nt) is only in McKnight haplotype 33.

|           |                   |                   |                   |                   |                                     |
|-----------|-------------------|-------------------|-------------------|-------------------|-------------------------------------|
| RefSeq    | <b>agcaatgaaa</b> | gcagcgacag        | cagtgacagc        | agcgatagca        | gtgacagca-----g                     |
| Hap3      | agcaatgaaa        | gcagcgacag        | cagtgacagc        | agcgatagca        | gtgacagca-----g                     |
| Hap4      | agcaatgaaa        | gcagcgacag        | cagtgacagc        | agcgatagca        | gtgacagcagcgatagcagtgacagcag        |
| Hap5      | agcaatgaaa        | gcagcgacag        | cagtgacagc        | agcgatagca        | gtgacagcagcgatagcagtgacagcag        |
| Hap6      | agcaatgaaa        | gcagcgacag        | cagtgacagc        | agcgatagca        | gtgacagcagcgatagcagtgacagcag        |
| Hap8      | agcaatgaaa        | gcagcgacag        | cagtgacagc        | agcgatagca        | gtgacagca-----g                     |
| Hap13     | agcaatgaaa        | gcagcgacag        | cagtgacagc        | agcgatagca        | gtgacagca-----g                     |
| Hap14     | agcaatgaaa        | gcagcgacag        | cagtgacagc        | agcgatagca        | gtgacagca-----g                     |
| Hap20     | agcaatgaaa        | gcagcgacag        | cagtgacagc        | agcgatagca        | gtgacagcagcgatagcagtgacagcag        |
| Hap22     | agcaatgaaa        | gcagcgacag        | cagtgacagc        | agcgatagca        | gtgacagca-----g                     |
| Hap24     | agcaatgaaa        | gcagcgacag        | cagtgacagc        | agcgatagca        | gtgacagca-----g                     |
| Hap25     | agcaatgaaa        | gcagcgacag        | cagtgacagc        | agcgatagca        | gtgacagca-----g                     |
| Hap26     | agcaatgaaa        | gcagcgacag        | cagtgacagc        | agcgatagca        | gtgacagca-----g                     |
| Hap28     | agcaatgaaa        | gcagcgacag        | cagtgacagc        | agcgatagca        | gtgacagca-----g                     |
| Hap29     | agcaatgaaa        | gcagcgacag        | cagtgacagc        | agcgatagca        | gtgacagca-----g                     |
| Hap31     | agcaatgaaa        | gcagcgacag        | cagtgacagc        | agcgatagca        | gtgacagcagcgatagcagtgacagcag        |
| Hap32     | agcaatgaaa        | gcagcgacag        | cagtgacagc        | agcgatagca        | gtgacagcagcgatagcagtgacagcag        |
| Hap33     | -----             | -----             | -----             | -----             | -----                               |
| Hap34     | agcaatgaaa        | gcagcgacag        | cagtgacagc        | agcgatagca        | gtgacagca-----g                     |
| Hap35     | agcaatgaaa        | gcagcgacag        | cagtgacagc        | agcgatagca        | gtgacagca-----g                     |
| Hap36     | agcaatgaaa        | gcagcgacag        | cagtgacagc        | agcgatagca        | gtgacagcagcgatagcagtgacagcag        |
| Hap37     | agcaatgaaa        | gcagcgacag        | cagtgacagc        | agcgatagca        | gtgacagca-----g                     |
| Hap38     | agcaatgaaa        | gcagcgacag        | cagtgacagc        | agcgatagca        | gtgacagcagcgatagcagtgacagcag        |
| SHap1:    | agcaatgaaa        | gcagcgacag        | cagtgacagc        | agcgatagca        | gtgacagca-----g                     |
| SHap2:    | agcaatgaaa        | gcagcgacag        | cagtgacagc        | agcgatagca        | gtgacagca-----g                     |
| SHap3:    | agcaatgaaa        | gcagcgacag        | cagtgacagc        | agcgatagca        | gtgacagca-----g                     |
| SHap4:    | agcaatgaaa        | gcagcgacag        | cagtgacagc        | agcgatagca        | gtgacagca-----g                     |
| SHap5:    | agcaatgaaa        | gcagcgacag        | cagtgacagc        | agcgatagca        | gtgacagca-----g                     |
| SHap6:    | agcaatgaaa        | gcagcgacag        | cagtgacagc        | agcgatagca        | gtgacagca-----g                     |
| SHap6 (2) | agcaatgaaa        | gcagcgacag        | cagtgacagc        | agcgatagca        | gtgacagca-----g                     |
| SHap7     | agcaatgaaa        | gcagcgacag        | cagtgacagc        | agcgatagca        | gtgacagca-----g                     |
| SHap102   | agcaatgaaa        | gcagcgacag        | cagtgacagc        | agcgatagca        | gtgacagcagcgatagcagtgacagcag        |
| SHap130   | agcaatgaaa        | gcagcgacag        | cagtgacagc        | agcgatagca        | gtgacagca-----g                     |
| SHap106   | agcaatgaaa        | gcagcgacag        | cagtgacagc        | agcgatagca        | gtgacagca-----g                     |
| SHap72    | agcaatgaaa        | gcagcgacag        | cagtgacagc        | agcgatagca        | gtgacagca-----g                     |
| SHap110   | agcaatgaaa        | gcagcgacag        | cagtgacagc        | agcgatagca        | gtgacagca-----g                     |
| Dong:     | agcaatgaaa        | gcagcgacag        | cagtgacagc        | agcgatagca        | gtgacagcagcgatagcagtgacagcag        |
| Merged    | <b>agcaatgaaa</b> | <b>gcagcgacag</b> | <b>cagtgacagc</b> | <b>agcgatagca</b> | <b>gtgacagcagcgatagcagtgacagcag</b> |
| Merged    | S N E             | S S D S           | S D S             | S D S             | S D S <b>S D S S D S S</b>          |

**Notes:** Indel 18 (18 Nt) corresponds to the insertion in DGI-III family (Dong et al.)

Id14: c.3739\_3740insGCGATAGCAGTGACAGCA; p.1246\_S1247insSDSSDS

Id14 (Song) is the same as Indel 18 (McKnight).

Figure S1. Human DPP Alignment, p. 27

|           |                   |                   |            |            |            |            |      |
|-----------|-------------------|-------------------|------------|------------|------------|------------|------|
| RefSeq    | caacagcagt        | gacagcagcg        | acagcagtga | tagcagtgac | agcacatctg | acagcaatga | 3800 |
| Hap3      | caacagcagt        | gacagcagcg        | acagcagtga | tagcagtgac | agcacatctg | acagcaatga |      |
| Hap4      | caacagcagt        | gacagcagcg        | acagcagtga | tagcagtgac | agcacatctg | acagcaatga |      |
| Hap5      | caacagcagt        | gacagcagcg        | acagcagtga | tagcagtgac | agcacatctg | acagcaatga |      |
| Hap6      | caacagcagt        | gacagcagcg        | acagcagtga | tagcagtgac | agcacatctg | acagcaatga |      |
| Hap8      | caacagcagt        | gacagcagcg        | acagcagtga | tagcagtgac | agcacatctg | acagcaatga |      |
| Hap13     | caacagcagt        | gacagcagcg        | acagcagtga | tagcagtgac | agcacatctg | acagcaatga |      |
| Hap14     | caacagcagt        | gacagcagcg        | acagcagtga | tagcagtgac | agcacatctg | acagcaatga |      |
| Hap20     | caacagcagt        | gacagcagcg        | acagcagtga | tagcagtgac | agcacatctg | acagcaatga |      |
| Hap22     | caacagcagt        | gacagcagcg        | acagcagtga | tagcagtgac | agcacatctg | acagcaatga |      |
| Hap24     | caacagcagt        | gacagcagcg        | acagcagtga | tagcagtgac | agcacatctg | acagcaatga |      |
| Hap25     | caacagcagt        | gacagcagcg        | acagcagtga | tagcagtgac | agcacatctg | acagcaatga |      |
| Hap26     | caacagcagt        | gacagcagcg        | acagcagtga | tagcagtgac | agcacatctg | acagcaatga |      |
| Hap28     | caacagcagt        | gacagcagcg        | acagcagtga | tagcagtgac | agcacatctg | acagcaatga |      |
| Hap29     | caacagcagt        | gacagcagcg        | acagcagtga | tagcagtgac | agcacatctg | acagcaatga |      |
| Hap31     | caacagcagt        | gacagcagcg        | acagcagtga | tagcagtgac | agcacatctg | acagcaatga |      |
| Hap32     | caacagcagt        | gacagcagcg        | acagcagtga | tagcagtgac | agcacatctg | acagcaatga |      |
| Hap33     | -----             | -----g            | acagcagtga | tagcagtgac | agcacatctg | acagcaatga |      |
| Hap34     | caacagcagt        | gacagcagcg        | acagcagtga | tagcagtgac | agcacatctg | acagcaatga |      |
| Hap35     | caacagcagt        | gacagcagcg        | acagcagtga | tagcagtgac | agcacatctg | acagcaatga |      |
| Hap36     | caacagcagt        | gacagcagcg        | acagcagtga | tagcagtgac | agcacatctg | acagcaatga |      |
| Hap37     | caacagcagt        | gacagcagcg        | acagcagtga | tagcagtgac | agcacatctg | acagcaatga |      |
| Hap38     | caacagcagt        | gacagcagcg        | acagcagtga | tagcagtgac | agcacatctg | acagcaatga |      |
| SHap1:    | caacagcagt        | gacagcagcg        | acagcagtga | tagcagtgac | agcacatctg | acagcaatga |      |
| SHap2:    | caacagcagt        | gacagcagcg        | acagcagtga | tagcagtgac | agcacatctg | acagcaatga |      |
| SHap3:    | caacagcagt        | gacagcagcg        | acagcagtga | tagcagtgac | agcacatctg | acagcaatga |      |
| SHap4:    | caacagcagt        | gacagcagcg        | acagcagtga | tagcagtgac | agcacatctg | acagcaatga |      |
| SHap5:    | caacagcagt        | gacagcagcg        | acagcagtga | tagcagtgac | agcacatctg | acagcaatga |      |
| SHap6:    | caacagcagt        | gacagcagcg        | acagcagtga | tagcagtgac | agcacatctg | acagcaatga |      |
| SHap6 (2) | caacagcagt        | gacagcagcg        | acagcagtga | tagcagtgac | agcacatctg | acagcaatga |      |
| SHap7     | caacagcagt        | gacagcagcg        | acagcagtga | tagcagtgac | agcacatctg | acagcaatga |      |
| SHap102   | caacagcagt        | gacagcagcg        | acagcagtga | tagcagtgac | agcacatctg | acagcaatga |      |
| SHap130   | caacagcagt        | gacagcagcg        | acagcagtga | tagcagtgac | agcacatctg | acagcaatga |      |
| SHap106   | caacagcagt        | gacagcagcg        | acagcagtga | tagcagtgac | agcacatctg | acagcaatga |      |
| SHap72    | caacagcagt        | gacagcagcg        | acagcagtga | tagcagtgac | agcacatctg | acagcaatga |      |
| SHap110   | caacagcagt        | gacagcagcg        | acagcagtga | tagcagtgac | agcacatctg | acagcaatga |      |
| Merged    | <b>caacagcagt</b> | <b>gacagcagcg</b> | acagcagtga | tagcagtgac | agcacatctg | acagcaatga |      |
| Merged    | N S S             | D S S             | D S S D    | S S D      | S T S      | D S N D    | 1267 |

Figure S1. Human DPP Alignment, p. 28

|           |            |            |            |            |            |            |      |
|-----------|------------|------------|------------|------------|------------|------------|------|
| RefSeq    | tgagagtgac | agccagagca | agtctggtaa | cggtaacaac | aatggaagtg | acagtgacag | 3860 |
| Hap3      | tgagagtgac | agccagagca | agtctggtaa | cggtaacaac | aatggaagtg | acagtgacag |      |
| Hap4      | tgagagtgac | agccagagca | agtctggtaa | cggtaacaac | aatggaagtg | acagtgacag |      |
| Hap5      | tgagagtgac | agccagagca | agtctggtaa | cggtaacaac | aatggaagtg | acagtgacag |      |
| Hap6      | tgagagtgac | agccagagca | agtctggtaa | cggtaacaac | aatggaagtg | acagtgacag |      |
| Hap8      | tgagagtgac | agccagagca | agtctggtaa | cggtaacaac | aatggaagtg | acagtgacag |      |
| Hap13     | tgagagtgac | agccagagca | agtctggtaa | cggtaacaac | aatggaagtg | acagtgacag |      |
| Hap14     | tgagagtgac | agccagagca | agtctggtaa | cggtaacaac | aatggaagtg | acagtgacag |      |
| Hap20     | tgagagtgac | agccagagca | agtctggtaa | cggtaacaac | aatggaagtg | acagtgacag |      |
| Hap22     | tgagagtgac | agccagagca | agtctggtaa | cggtaacaac | aatggaagtg | acagtgacag |      |
| Hap24     | tgagagtgac | agccagagca | agtctggtaa | cggtaacaac | aatggaagtg | acagtgacag |      |
| Hap25     | tgagagtgac | agccagagca | agtctggtaa | cggtaacaac | aatggaagtg | acagtgacag |      |
| Hap26     | tgagagtgac | agccagagca | agtctggtaa | cggtaacaac | aatggaagtg | acagtgacag |      |
| Hap28     | tgagagtgac | agccagagca | agtctggtaa | cggtaacaac | aatggaagtg | acagtgacag |      |
| Hap29     | tgagagtgac | agccagagca | agtctggtaa | cggtaacaac | aatggaagtg | acagtgacag |      |
| Hap31     | tgagagtgac | agccagagca | agtctggtaa | cggtaacaac | aatggaagtg | acagtgacag |      |
| Hap32     | tgagagtgac | agccagagca | agtctggtaa | cggtaacaac | aatggaagtg | acagtgacag |      |
| Hap33     | tgagagtgac | agccagagca | agtctggtaa | cggtaacaac | aatggaagtg | acagtgacag |      |
| Hap34     | tgagagtgac | agccagagca | agtctggtaa | cggtaacaac | aatggaagtg | acagtgacag |      |
| Hap35     | tgagagtgac | agccagagca | agtctggtaa | cggtaacaac | aatggaagtg | acagtgacag |      |
| Hap36     | tgagagtgac | agccagagca | agtctggtaa | cggtaacaac | aatggaagtg | acagtgacag |      |
| Hap37     | tgagagtgac | agccagagca | agtctggtaa | cggtaacaac | aatggaagtg | acagtgacag |      |
| Hap38     | tgagagtgac | agccagagca | agtctggtaa | cggtaacaac | aatggaagtg | acagtgacag |      |
| SHap1:    | tgagagtgac | agccagagca | agtctggtaa | cggtaacaac | aatggaagtg | acagtgacag |      |
| SHap2:    | tgagagtgac | agccagagca | agtctggtaa | cggtaacaac | aatggaagtg | acagtgacag |      |
| SHap3:    | tgagagtgac | agccagagca | agtctggtaa | cggtaacaac | aatggaagtg | acagtgacag |      |
| SHap4:    | tgagagtgac | agccagagca | agtctggtaa | cggtaacaac | aatggaagtg | acagtgacag |      |
| SHap5:    | tgagagtgac | agccagagca | agtctggtaa | cggtaacaac | aatggaagtg | acagtgacag |      |
| SHap6:    | tgagagtgac | agccagagca | agtctggtaa | cggtaacaac | aatggaagtg | acagtgacag |      |
| SHap6 (2) | tgagagtgac | agccagagca | agtctggtaa | cggtaacaac | aatggaagtg | acagtgacag |      |
| SHap7     | tgagagtgac | agccagagca | agtctggtaa | cggtaacaac | aatggaagtg | acagtgacag |      |
| SHap102   | tgagagtgac | agccagagca | agtctggtaa | cggtaacaac | aatggaagtg | acagtgacag |      |
| SHap130   | tgagagtgac | agccagagca | agtctggtaa | cggtaacaac | aatggaagtg | acagtgacag |      |
| SHap106   | tgagagtgac | agccagagca | agtctggtaa | cggtaacaac | aatggaagtg | acagtgacag |      |
| SHap72    | tgagagtgac | agccagagca | agtctggtaa | cggtaacaac | aatggaagtg | acagtgacag |      |
| SHap110   | tgagagtgac | agccagagca | agtctggtaa | cggtaacaac | aatggaagtg | acagtgacag |      |
| Dong:     | tgagagtgac | agccagagca | agtctggtaa | cggtaacaac | aatggaagtg | acagtgacag |      |
| Merged    | tgagagtgac | agccagagca | agtctggtaa | cggtaacaac | aatggaagtg | acagtgacag |      |
| Merged    | E S D      | S Q S K    | S G N      | G N N      | N G S D    | S D S      | 1287 |

Figure S1. Human DPP Alignment, p. 29

|           |            |            |            |            |        |      |   |   |   |   |   |   |   |   |   |      |
|-----------|------------|------------|------------|------------|--------|------|---|---|---|---|---|---|---|---|---|------|
| RefSeq    | tgacagtgaa | ggcagtgaca | gtaaccactc | aaccagtgat | gattag | 3906 |   |   |   |   |   |   |   |   |   |      |
| Hap3      | tgacagtgaa | ggcagtgaca | gtaaccactc | aaccagtgat | gattag |      |   |   |   |   |   |   |   |   |   |      |
| Hap4      | tgacagtgaa | ggcagtgaca | gtaaccactc | aaccagtgat | gattag |      |   |   |   |   |   |   |   |   |   |      |
| Hap5      | tgacagtgaa | ggcagtgaca | gtaaccactc | aaccagtgat | gattag |      |   |   |   |   |   |   |   |   |   |      |
| Hap6      | tgacagtgaa | ggcagtgaca | gtaaccactc | aaccagtgat | gattag |      |   |   |   |   |   |   |   |   |   |      |
| Hap8      | tgacagtgaa | ggcagtgaca | gtaaccactc | aaccagtgat | gattag |      |   |   |   |   |   |   |   |   |   |      |
| Hap13     | tgacagtgaa | ggcagtgaca | gtaaccactc | aaccagtgat | gattag |      |   |   |   |   |   |   |   |   |   |      |
| Hap14     | tgacagtgaa | ggcagtgaca | gtaaccactc | aaccagtgat | gattag |      |   |   |   |   |   |   |   |   |   |      |
| Hap20     | tgacagtgaa | ggcagtgaca | gtaaccactc | aaccagtgat | gattag |      |   |   |   |   |   |   |   |   |   |      |
| Hap22     | tgacagtgaa | ggcagtgaca | gtaaccactc | aaccagtgat | gattag |      |   |   |   |   |   |   |   |   |   |      |
| Hap24     | tgacagtgaa | ggcagtgaca | gtaaccactc | aaccagtgat | gattag |      |   |   |   |   |   |   |   |   |   |      |
| Hap25     | tgacagtgaa | ggcagtgaca | gtaaccactc | aaccagtgat | gattag |      |   |   |   |   |   |   |   |   |   |      |
| Hap26     | tgacagtgaa | ggcagtgaca | gtaaccactc | aaccagtgat | gattag |      |   |   |   |   |   |   |   |   |   |      |
| Hap28     | tgacagtgaa | ggcagtgaca | gtaaccactc | aaccagtgat | gattag |      |   |   |   |   |   |   |   |   |   |      |
| Hap29     | tgacagtgaa | ggcagtgaca | gtaaccactc | aaccagtgat | gattag |      |   |   |   |   |   |   |   |   |   |      |
| Hap31     | tgacagtgaa | ggcagtgaca | gtaaccactc | aaccagtgat | gattag |      |   |   |   |   |   |   |   |   |   |      |
| Hap32     | tgacagtgaa | ggcagtgaca | gtaaccactc | aaccagtgat | gattag |      |   |   |   |   |   |   |   |   |   |      |
| Hap33     | tgacagtgaa | ggcagtgaca | gtaaccactc | aaccagtgat | gattag |      |   |   |   |   |   |   |   |   |   |      |
| Hap34     | tgacagtgaa | ggcagtgaca | gtaaccactc | aaccagtgat | gattag |      |   |   |   |   |   |   |   |   |   |      |
| Hap35     | tgacagtgaa | ggcagtgaca | gtaaccactc | aaccagtgat | gattag |      |   |   |   |   |   |   |   |   |   |      |
| Hap36     | tgacagtgaa | ggcagtgaca | gtaaccactc | aaccagtgat | gattag |      |   |   |   |   |   |   |   |   |   |      |
| Hap37     | tgacagtgaa | ggcagtgaca | gtaaccactc | aagcagtgat | gattag |      |   |   |   |   |   |   |   |   |   |      |
| Hap38     | tgacagtgaa | ggcagtgaca | gtaaccactc | aaccagtgat | gattag |      |   |   |   |   |   |   |   |   |   |      |
| SHap1:    | tgacagtgaa | ggcagtgaca | gtaaccactc | aaccagtgat | gattag |      |   |   |   |   |   |   |   |   |   |      |
| SHap2:    | tgacagtgaa | ggcagtgaca | gtaaccactc | aaccagtgat | gattag |      |   |   |   |   |   |   |   |   |   |      |
| SHap3:    | tgacagtgaa | ggcagtgaca | gtaaccactc | aaccagtgat | gattag |      |   |   |   |   |   |   |   |   |   |      |
| SHap4:    | tgacagtgaa | ggcagtgaca | gtaaccactc | aaccagtgat | gattag |      |   |   |   |   |   |   |   |   |   |      |
| SHap5:    | tgacagtgaa | ggcagtgaca | gtaaccactc | aaccagtgat | gattag |      |   |   |   |   |   |   |   |   |   |      |
| SHap6:    | tgacagtgaa | ggcagtgaca | gtaaccactc | aaccagtgat | gattag |      |   |   |   |   |   |   |   |   |   |      |
| SHap6 (2) | tgacagtgaa | ggcagtgaca | gtaaccactc | aaccagtgat | gattag |      |   |   |   |   |   |   |   |   |   |      |
| SHap7     | tgacagtgaa | ggcagtgaca | gtaaccactc | aaccagtgat | gattag |      |   |   |   |   |   |   |   |   |   |      |
| SHap102   | tgacagtgaa | ggcagtgaca | gtaaccactc | aaccagtgat | gattag |      |   |   |   |   |   |   |   |   |   |      |
| SHap130   | tgacagtgaa | ggcagtgaca | gtaaccactc | aaccagtgat | gattag |      |   |   |   |   |   |   |   |   |   |      |
| SHap106   | tgacagtgaa | ggcagtgaca | gtaaccactc | aaccagtgat | gattag |      |   |   |   |   |   |   |   |   |   |      |
| SHap72    | tgacagtgaa | ggcagtgaca | gtaaccactc | aaccagtgat | gattag |      |   |   |   |   |   |   |   |   |   |      |
| SHap110   | tgacagtgaa | ggcagtgaca | gtaaccactc | aaccagtgat | gattag |      |   |   |   |   |   |   |   |   |   |      |
| Dong:     | tgacagtgaa | ggcagtgaca | gtaaccactc | aaccagtgat | gattag |      |   |   |   |   |   |   |   |   |   |      |
| Merged    | tgacagtgaa | ggcagtgaca | gtaaccactc | aaccagtgat | gattag |      |   |   |   |   |   |   |   |   |   |      |
| Merged    | D          | S          | E          | G          | S      | D    | S | N | H | S | T | S | D | D | * | 1301 |







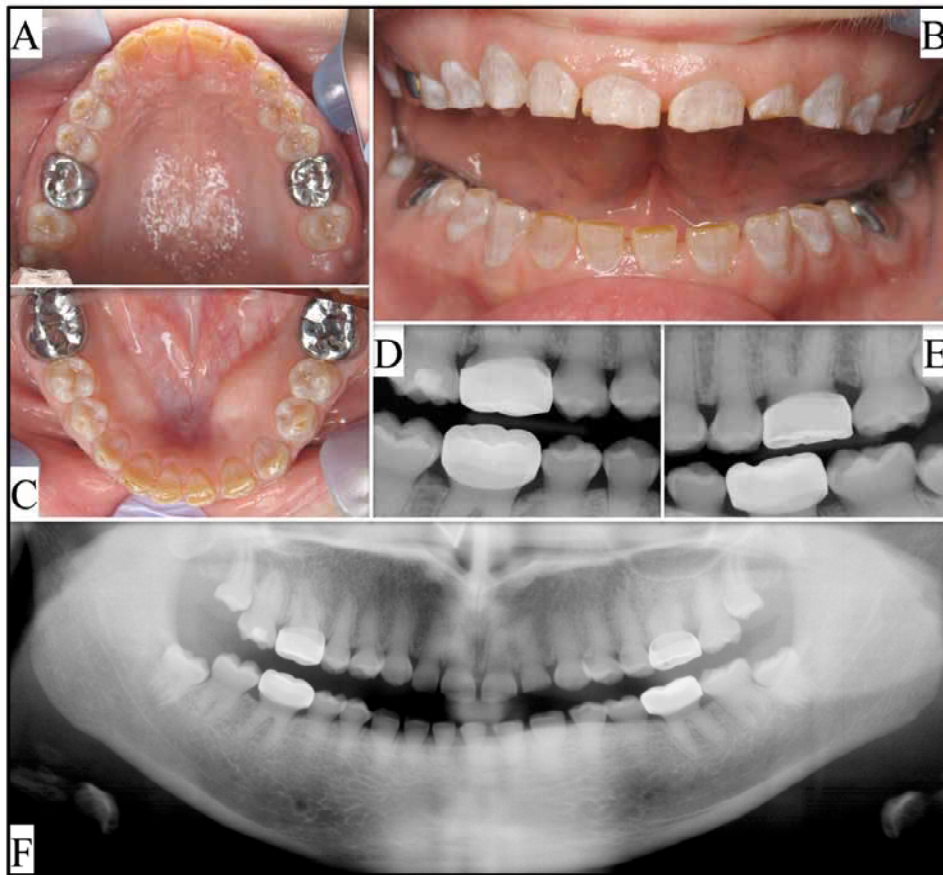

**Figure S4.** Oral photographs and dental radiographs of the family 1 proband (IV:1). This female subject was 18 years old at the time of documentation. *A*: Maxillary occlusal photograph; *B*: mandibular occlusal photograph; *C*: frontal photograph. The dental crowns are translucent with vertical grooves of hypoplastic enamel. There are spaces between the anterior teeth. *D*: Right bitewing radiograph; *E*: left bitewing radiograph; *F*: panoramic radiograph. The pulp chambers and root canals of all the teeth except the third molars are obliterated. The roots of many teeth appear shorter than normal, particularly the anteriors. The premolar and molar crowns appear bulbous.

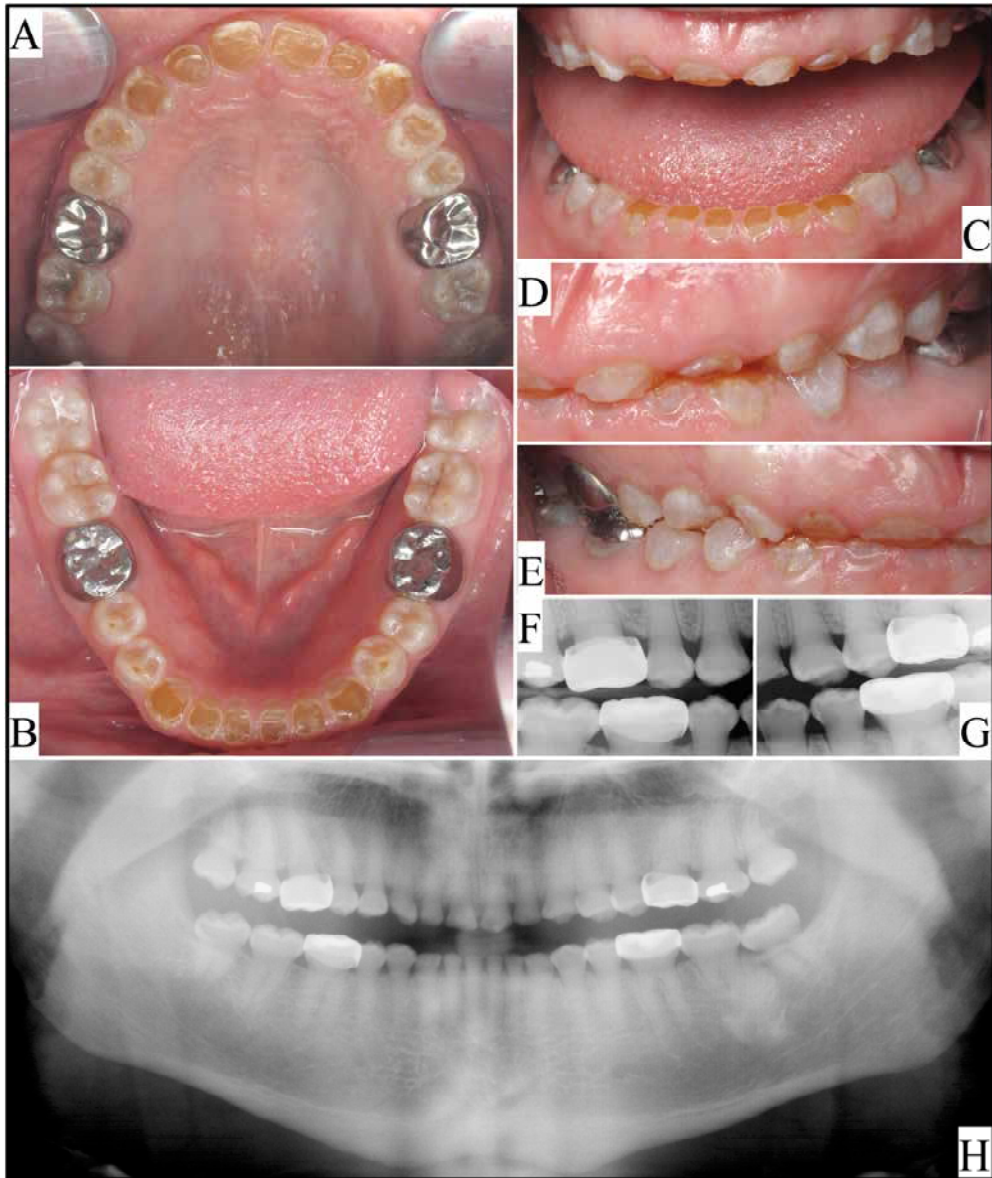

**Figure S5.** Oral photographs and dental radiographs of family 1 proband's affected youngest brother (IV:3). **A:** Maxillary occlusal; **B:** mandibular occlusal; **C:** mandibular frontal; **D:** left buccals; **E:** right buccals; **F:** right bitewing radiograph; **G:** left bitewing radiograph; **H:** panoramic radiograph.

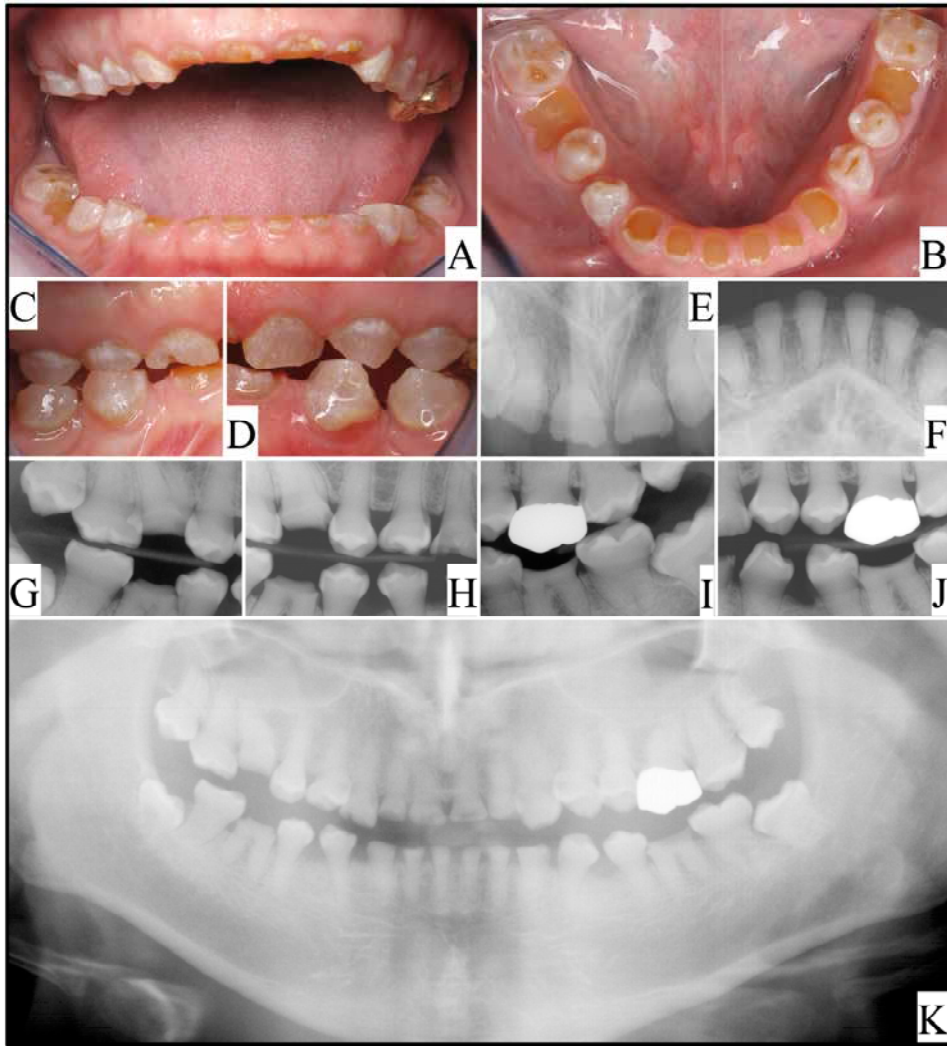

**Figure S6.** Oral photographs and dental radiographs of family 1 proband's other affected brother (IV:2). This male subject was 17 years old at the time of documentation. **A:** Frontal photograph; **B:** mandibular occlusal; **C:** right buccals; **D:** left buccals; **E:** maxillary anterior periapical radiograph; **F:** mandibular anterior periapical radiograph; **G-H:** right bitewing radiographs; **I-J:** left bitewing radiographs; **K:** panoramic radiograph. Crowns are translucent; first molars show failed restoration with crowns. Pulp chambers and root canals are obliterated of all teeth, except erupting third molars.

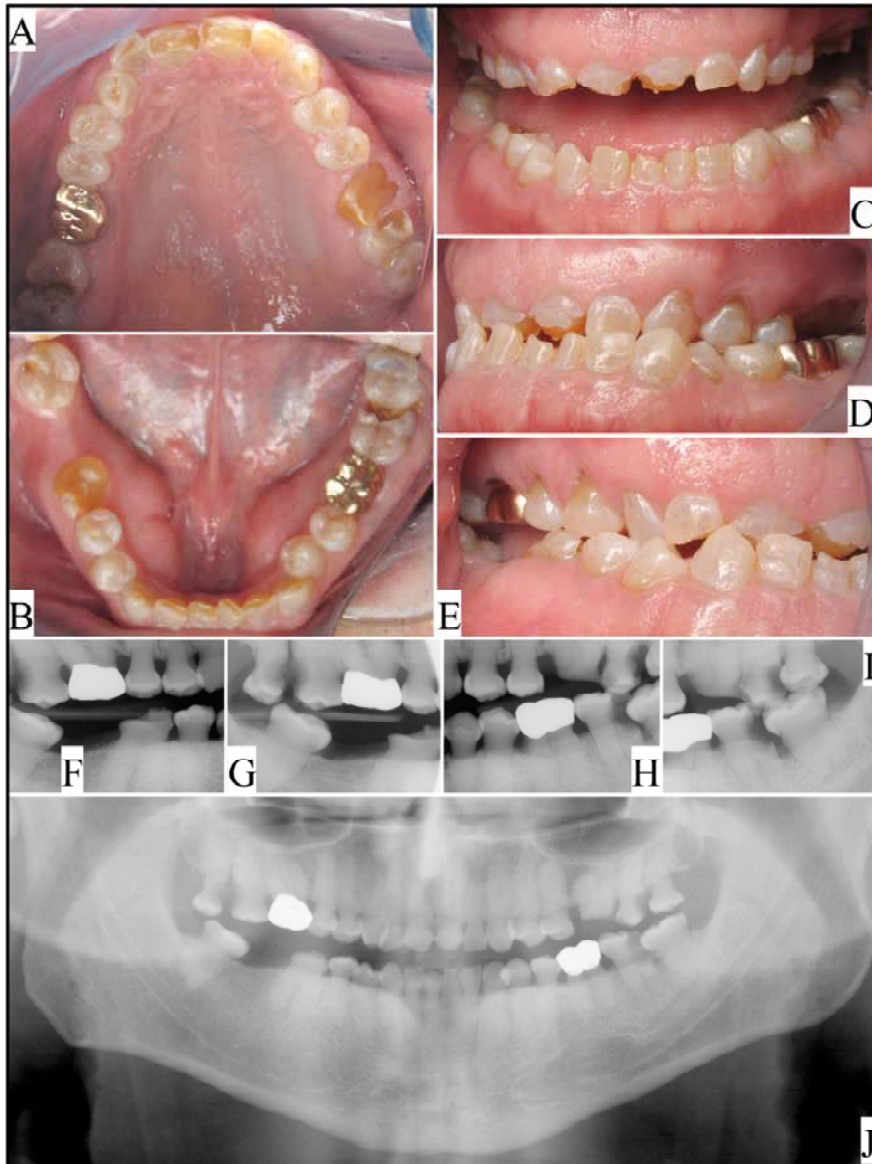

Figure S7. Oral photographs and dental radiographs of the family 1 affected father (III:7).

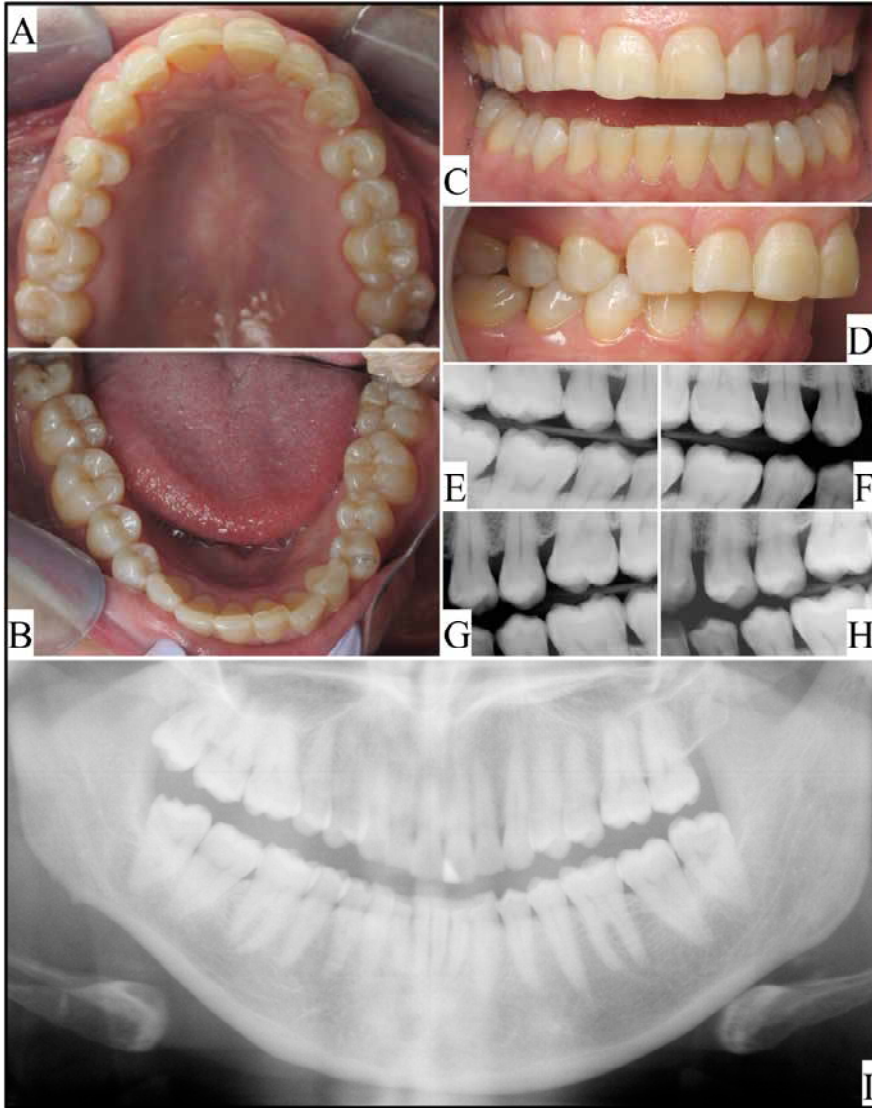

Figure S8. Oral photographs and dental radiographs of the family 1 unaffected mother (III:8).

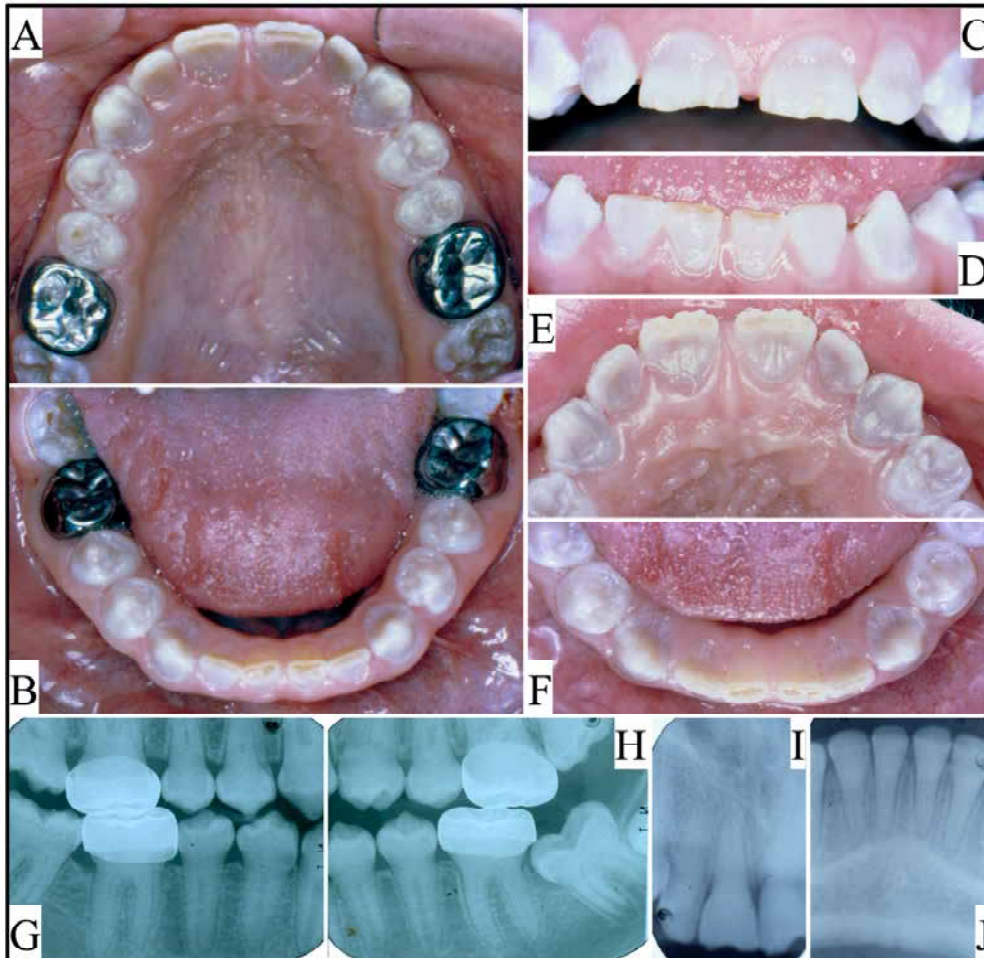

**Figure S9.** Oral photographs and dental radiographs of family 2 proband (IV:2). This male subject was 12 years old at the time of documentation. *A*: Maxillary occlusal photograph; *B*: mandibular occlusal photograph; *C*: maxillary frontal photograph; *D*: mandibular frontal photograph; *E*: maxillary anterior occlusal photograph; *F*: mandibular anterior occlusal photograph; *G*: right bitewing radiograph; *H*: left bitewing radiograph; *I*: maxillary anterior periapical; *J*: maxillary anterior periapical. The crowns are mostly translucent with some chalky white areas. The vertical grooves of enamel defect are evident, especially on the lingual surfaces of lower anterior teeth. The incisal edges of the anterior teeth exhibit moderate attrition. Pulp chambers and root canals are mostly obliterated in the incisors and first molars, but can be detected in other teeth, especially those that are still forming their roots.
